# Supplementary material for: Integration of Two Diploid Potato Linkage Maps with the Potato Genome Sequence
Source: PLoS One. 2012 Apr 27;7(4):e36347. doi: 10.1371/journal.pone.0036347 (PMC3338666; doi:10.1371/journal.pone.0036347)
Supplement: Table S2 — List of potato genes containing SNPs on the Infinium 8303 Potato Array. PGSC gene ID numbers for genes that are represented on the Infinium 8303 Potato Array, the number of SNPs within each gene and the PGSC gene annotation. (XLSX) [file pone.0036347.s006.xlsx]

## Sheet: Sheet1
Table S2. List of potato genes containing SNPs on the Infinium 8303 Potato Array.
PGSC_Gene_ID	8303_Array_SNP_Count	PGSC_Gene_Annotation
PGSC0003DMG400004966	29	Receptor protein kinase CLAVATA1
PGSC0003DMG400012599	20	Rrm/rnp domain
PGSC0003DMG400009981	18	1,4-alpha-glucan branching enzyme
PGSC0003DMG400019605	18	Pyruvate kinase family protein
PGSC0003DMG400008576	18	Multidrug resistance protein ABC transporter family
PGSC0003DMG400021264	18	Phosphoenolpyruvate carboxylase
PGSC0003DMG400027936	17	Sucrose-phosphate-synthase
PGSC0003DMG400015385	17	Phosphoenolpyruvate carboxylase
PGSC0003DMG400013856	16	Vacuolar invertase
PGSC0003DMG400027227	15	Glycosyltransferase, CAZy family GT8
PGSC0003DMG400030212	15	Nitrate reductase
PGSC0003DMG400007019	15	Transketolase 1
PGSC0003DMG400014152	15	Hydroxycinnamoyl transferase
PGSC0003DMG400009380	14	Receptor protein kinase CLAVATA1
PGSC0003DMG400031262	14	Methyltransferase
PGSC0003DMG400026671	14	Arginine decarboxylase
PGSC0003DMG400020422	13	Phosphoenolpyruvate carboxylase
PGSC0003DMG400024327	13	Leaf protein
PGSC0003DMG400023508	13	Kinase
PGSC0003DMG400015547	13	Protein kinase
PGSC0003DMG402003179	12	Glycosyltransferase, CAZy family GT8
PGSC0003DMG400008926	12	Eukaryotic translation initiation factor 3 subunit A
PGSC0003DMG400015162	12	Nodulation receptor kinase
PGSC0003DMG400013684	12	Elicitor-inducible cytochrome P450
PGSC0003DMG400008081	12	Auxin response factor
PGSC0003DMG400011749	12	UDP-galactose:solanidine galactosyltransferase
PGSC0003DMG400029029	11	Phosphatidylinositol 4-phosphate 5-kinase
PGSC0003DMG400004101	11	H(+)-transporting ATPase
PGSC0003DMG402007955	11	Serine/threonine-protein kinase PBS1
PGSC0003DMG400006560	10	Methyltransferase
PGSC0003DMG400010641	10	Pheophorbide A oxygenase
PGSC0003DMG400030682	10	Inorganic pyrophosphatase
PGSC0003DMG400002290	10	Early-responsive to dehydration 4
PGSC0003DMG400009081	10	Pectin methylesterase 1
PGSC0003DMG400015933	10	Pectinesterase PPE8B
PGSC0003DMG400001932	10	6-phosphogluconate dehydrogenase, decarboxylating
PGSC0003DMG402022197	10	Fimbrin
PGSC0003DMG400008711	10	Avr9/Cf-9 rapidly elicited protein 76
PGSC0003DMG400000689	10	Glucan endo-1,3-beta-glucosidase
PGSC0003DMG400016003	10	Ethylene responsive element binding protein C2
PGSC0003DMG400030209	10	BRASSINOSTEROID INSENSITIVE 1-associated receptor kinase 1
PGSC0003DMG400026187	9	Nbs-lrr resistance protein
PGSC0003DMG400026997	9	Protein kinase atmrk1
PGSC0003DMG400009689	9	Protein kinase
PGSC0003DMG400014223	9	4-coumarate--CoA ligase 2
PGSC0003DMG400011189	9	HQT
PGSC0003DMG400028362	9	Dihydropterin pyrophosphokinase-dihydropteroate synthase
PGSC0003DMG400001328	9	Granule-bound starch synthase 2, chloroplastic/amyloplastic
PGSC0003DMG400023950	9	SNF2 domain-containing protein
PGSC0003DMG400019635	9	BEL5 protein
PGSC0003DMG400013547	9	Sucrose sythase
PGSC0003DMG400001355	9	Mitochondrial processing peptidase
PGSC0003DMG400022953	9	Pyruvate decarboxylase
PGSC0003DMG400007466	9	Phosphoenolpyruvate carboxylase
PGSC0003DMG400012910	9	Glucose-6-phosphate isomerase
PGSC0003DMG400028380	9	Mitochondrial processing peptidase
PGSC0003DMG400010704	9	Calcium-dependent protein kinase 8
PGSC0003DMG400009965	9	Pectinesterase
PGSC0003DMG400001451	9	Folate carrier protein
PGSC0003DMG400010333	9	Glutathione transferase
PGSC0003DMG400012409	9	3-hydroxyacyl-CoA dehyrogenase
PGSC0003DMG400030654	8	VTC2
PGSC0003DMG400026930	8	Flavonoid glucoyltransferase UGT73N1
PGSC0003DMG400008891	8	GDP-mannose pyrophosphorylase
PGSC0003DMG400000289	8	Mitochondrial-processing peptidase subunit alpha
PGSC0003DMG400008307	8	3-beta hydroxysteroid dehydrogenase/isomerase
PGSC0003DMG400004259	8	Thaumatin
PGSC0003DMG400043373	8	6-phosphogluconate dehydrogenase, decarboxylating
PGSC0003DMG400023458	8	Phenylalanine ammonia-lyase
PGSC0003DMG400024890	8	Receptor protein kinase CLAVATA1
PGSC0003DMG400025878	8	Phenylpropanoid:glucosyltransferase 1
PGSC0003DMG400009868	8	Multi-copper oxidase type I family protein
PGSC0003DMG400011740	8	SGA
PGSC0003DMG400009992	8	Glyceraldehyde-3-phosphate dehydrogenase B subunit
PGSC0003DMG400023793	8	Phosphatidylinositol-4-phosphate 5-kinase
PGSC0003DMG400030430	8	Anionic peroxidase swpa7
PGSC0003DMG400026530	8	Neutral invertase
PGSC0003DMG400022263	8	Fructose-bisphosphate aldolase
PGSC0003DMG400003469	8	Phosphonopyruvate decarboxylase
PGSC0003DMG400018679	8	3-hydroxy-3-methylglutaryl-coenzyme A reductase 3
PGSC0003DMG400007081	8	Solanesyl diphosphate synthase
PGSC0003DMG402003899	8	PIP5K9
PGSC0003DMG400028278	8	UDP-glucose:glucosyltransferase
PGSC0003DMG400000954	8	Isoamylase isoform 2
PGSC0003DMG400012012	8	Fructose-bisphosphate aldolase
PGSC0003DMG400013108	8	Metal transporter
PGSC0003DMG400006354	8	Flavonoid 3-hydroxylase
PGSC0003DMG400025283	8	Conserved gene of unknown function
PGSC0003DMG400021116	8	UDP-glucoronosyl/UDP-glucosyl transferase family protein
PGSC0003DMG400013855	8	Multicopper oxidase
PGSC0003DMG401007955	8	ALCATRAZ/SPATULA
PGSC0003DMG400019494	7	Beta-fructofuranosidase
PGSC0003DMG400000761	7	Multicopper oxidase
PGSC0003DMG400001368	7	FERONIA receptor-like kinase
PGSC0003DMG400002014	7	Avr9/Cf-9 rapidly elicited protein 76
PGSC0003DMG400011132	7	NADP-dependent glyceraldehyde-3-phosphate dehydrogenase
PGSC0003DMG400025734	7	Pyruvate kinase
PGSC0003DMG400019110	7	Chalcone synthase 2
PGSC0003DMG400020105	7	GTP cyclohydrolase I
PGSC0003DMG400028632	7	Flavonoid glucoyltransferase UGT73E2
PGSC0003DMG400025492	7	Peroxidase
PGSC0003DMG400003155	7	4-coumarate:CoA ligase
PGSC0003DMG400009924	7	3-hydroxy-3-methylglutaryl coenzyme A reductase
PGSC0003DMG400025610	7	Sucrose transporter
PGSC0003DMG400013088	7	Neutral invertase
PGSC0003DMG401012339	7	BHLH transcription factor JAF13
PGSC0003DMG400006800	7	NBS-LRR protein
PGSC0003DMG400029575	7	Catechol oxidase B, chloroplastic
PGSC0003DMG401028252	7	Beta-fructofuranosidase
PGSC0003DMG400026963	7	ARGONAUTE 1
PGSC0003DMG400007462	7	NRC1
PGSC0003DMG400004953	7	Homeotic protein knotted-1
PGSC0003DMG402016475	7	Glucan endo-1,3-beta-glucosidase
PGSC0003DMG401007604	7	Eukaryotic peptide chain release factor subunit 1-3
PGSC0003DMG400015794	7	Cis-prenyltransferase
PGSC0003DMG400025331	7	Short chain alcohol dehydrogenase
PGSC0003DMG400024344	7	Anthocyanidin 3-O-glucosyltransferase
PGSC0003DMG400024643	7	Flavonoid 3'-monooxygenase
PGSC0003DMG400013490	7	Prf
PGSC0003DMG400027797	7	TIR-NBS-LRR disease resistance
PGSC0003DMG400013183	7	Calcium-dependent protein kinase 1
PGSC0003DMG400000486	7	Monodehydroascorbate reductase
PGSC0003DMG400033034	7	Plasma membrane H+-ATPase
PGSC0003DMG400004800	7	Gene of unknown function
PGSC0003DMG400001525	7	NAD-dependent isocitrate dehydrogenase
PGSC0003DMG400024008	7	Conserved gene of unknown function
PGSC0003DMG400008673	7	Endochitinase (Chitinase)
PGSC0003DMG400005930	7	BEL5 protein
PGSC0003DMG400012395	7	Malate dehydrogenase
PGSC0003DMG400028929	6	4-coumarate--CoA ligase 2
PGSC0003DMG400030158	6	50 kDa ketoavyl-ACP synthase
PGSC0003DMG400031103	6	Leucine-rich receptor kinase
PGSC0003DMG400029325	6	PS60 protein
PGSC0003DMG400019511	6	NAD-malate dehydrogenase
PGSC0003DMG400030961	6	BEL30 protein
PGSC0003DMG400020363	6	Fructose-1,6-bisphosphatase
PGSC0003DMG400009873	6	Dead box ATP-dependent RNA helicase
PGSC0003DMG400008780	6	Conserved gene of unknown function
PGSC0003DMG400022292	6	Lysine decarbxylase
PGSC0003DMG400024755	6	Xyloglucan endotransglucosylase/hydrolase 1
PGSC0003DMG400003324	6	Squalene epoxidase
PGSC0003DMG400024267	6	Bel1 homeotic protein
PGSC0003DMG400015548	6	Peroxidase 15
PGSC0003DMG400026325	6	ATP binding protein
PGSC0003DMG400030625	6	Receptor protein kinase CLAVATA1
PGSC0003DMG400012111	6	Granule-bound starch synthase 1, chloroplastic/amyloplastic
PGSC0003DMG400017707	6	4-hydroxyphenylpyruvate dioxygenase
PGSC0003DMG400026392	6	Mannose-6-phosphate isomerase
PGSC0003DMG400019418	6	Cc-nbs-lrr resistance protein
PGSC0003DMG400017625	6	Serine/threonine protein kinase
PGSC0003DMG400009299	6	Conserved gene of unknown function
PGSC0003DMG400008354	6	Conserved gene of unknown function
PGSC0003DMG400008445	6	60S ribosomal protein L6
PGSC0003DMG400015761	6	26S proteasome subunit RPN2a
PGSC0003DMG400014875	6	Conserved gene of unknown function
PGSC0003DMG400000169	6	Beta-amylase
PGSC0003DMG400003918	6	Acc synthase
PGSC0003DMG400022341	6	Suberization-associated anionic peroxidase 2
PGSC0003DMG400031365	6	Phenylalanine ammonia-lyase
PGSC0003DMG400024294	6	Electron carrier
PGSC0003DMG400033362	6	Histone acetyltransferase type B catalytic subunit
PGSC0003DMG402017934	6	Pectinesterase
PGSC0003DMG400003446	6	Undecaprenyl pyrophosphate synthetase
PGSC0003DMG400006672	6	Sucrose synthase
PGSC0003DMG402024352	6	Conserved gene of unknown function
PGSC0003DMG402000895	6	Chlorophyll synthase
PGSC0003DMG400012642	6	3-ketoacyl-CoA reductase 1
PGSC0003DMG400026794	5	Conserved gene of unknown function
PGSC0003DMG401031045	5	AGO1-1
PGSC0003DMG400031084	5	Glucose-1-phosphate adenylyltransferase small subunit, chloroplastic/amyloplastic
PGSC0003DMG400008159	5	Lycopene beta cyclase, chloroplastic
PGSC0003DMG400028224	5	Carotenoid isomerase, chloroplastic
PGSC0003DMG400019063	5	UDP-sulfoquinovose synthase
PGSC0003DMG400024145	5	Beta-amylase
PGSC0003DMG400029620	5	Chalcone synthase 1B
PGSC0003DMG400003461	5	3-hydroxy-3-methylglutaryl coenzyme A reductase
PGSC0003DMG400023282	5	Leucine-rich repeat transmembrane protein kinase
PGSC0003DMG400012478	5	L-lactate dehydrogenase
PGSC0003DMG400028958	5	Multicopper oxidase
PGSC0003DMG401019891	5	AMP dependent CoA ligase
PGSC0003DMG400010147	5	Kunitz-type enzyme inhibitor S9C11
PGSC0003DMG400007308	5	Proteasome subunit alpha type
PGSC0003DMG400000909	5	Aminoacylase
PGSC0003DMG400005381	5	Brca1 associated ring domain
PGSC0003DMG400024342	5	Cytochrome P450
PGSC0003DMG400004151	5	Thiamine biosynthesis protein ThiC variant L1
PGSC0003DMG400003751	5	Bel1 homeotic protein
PGSC0003DMG400020103	5	Glycosyltransferase QUASIMODO1
PGSC0003DMG400022473	5	Zeta-carotene desaturase
PGSC0003DMG400010913	5	Pyruvate kinase, cytosolic isozyme
PGSC0003DMG402000056	5	Bypass1
PGSC0003DMG400015829	5	LeArcA1 protein
PGSC0003DMG400000010	5	Glycosyltransferase
PGSC0003DMG400014208	5	Inorganic pyrophosphatase
PGSC0003DMG400005371	5	Acyl-CoA thioesterase
PGSC0003DMG400016223	5	Peroxidase 17
PGSC0003DMG400001455	5	Serine carboxypeptidase-like 25
PGSC0003DMG400012112	5	Glucan endo-1,3-beta-glucosidase
PGSC0003DMG400000282	5	Serine acetyltransferase 7
PGSC0003DMG400022855	5	1-D-deoxyxylulose 5-phosphate synthase
PGSC0003DMG401005658	5	ArcA2 protein
PGSC0003DMG401020721	5	Leucine-rich repeat-containing protein
PGSC0003DMG400011047	5	60S ribosomal protein L4/L1
PGSC0003DMG400025435	5	Calcium-dependent protein kinase 2
PGSC0003DMG400017508	5	UDP-glucose:solanidine glucosyltransferase
PGSC0003DMG400028361	5	Alpha-1,4-glucan-protein synthase [UDP-forming] 1
PGSC0003DMG400022827	5	Sphingolipid delta 4 desaturase DES-1
PGSC0003DMG400002321	5	ACC oxidase
PGSC0003DMG400009019	5	ATP-dependent RNA helicase
PGSC0003DMG400003563	5	Flavanone 3 beta-hydroxylase
PGSC0003DMG400003138	5	Elongation factor Ts
PGSC0003DMG400025121	5	6-phosphogluconate dehydrogenase, decarboxylating
PGSC0003DMG400021323	5	BEL29 protein
PGSC0003DMG400030245	5	Calcium dependent protein kinase 13
PGSC0003DMG400009698	5	Ferredoxin-dependent glutamate synthase 1
PGSC0003DMG400012800	5	Aminotransferase
PGSC0003DMG400022318	5	Calcium-dependent protein kinase CDPK1
PGSC0003DMG400024139	5	Alcohol acyl transferase
PGSC0003DMG400037460	5	Pto
PGSC0003DMG400020587	5	Rpi-vnt1
PGSC0003DMG400024357	5	DnaJ isoform
PGSC0003DMG400001662	5	Arginine decarboxylase
PGSC0003DMG400024109	5	Fructose-1,6-bisphosphatase, cytosolic
PGSC0003DMG400010007	5	Pyrophosphate--fructose 6-phosphate 1-phosphotransferase subunit alpha
PGSC0003DMG400000333	5	Lycopene epsilon cyclase
PGSC0003DMG400003654	5	Peroxidase
PGSC0003DMG400008575	5	Tryptophan decarboxylase
PGSC0003DMG400015755	5	DnaJ isoform
PGSC0003DMG400001549	5	Beta-amylase
PGSC0003DMG400017413	5	Phosphofructokinase
PGSC0003DMG400031482	4	CST complex subunit CTC1
PGSC0003DMG400001191	4	Nucleolin
PGSC0003DMG400027269	4	ATPIP5K1
PGSC0003DMG400023319	4	Alcohol dehydrogenase
PGSC0003DMG400000714	4	Isoform 2 of F-box protein
PGSC0003DMG400007647	4	MAPKKK7
PGSC0003DMG400000561	4	Transparent testa glabra 1
PGSC0003DMG401019061	4	Ligatin
PGSC0003DMG400008664	4	Conserved gene of unknown function
PGSC0003DMG400006894	4	Nucleic acid binding protein
PGSC0003DMG400010025	4	Multicopper oxidase
PGSC0003DMG401011946	4	KAK (KAKTUS) isoform 1
PGSC0003DMG400013022	4	Calcium-transporting ATPase 2, plasma membrane-type
PGSC0003DMG400029921	4	GRAS9
PGSC0003DMG400009156	4	Phytoene dehydrogenase, chloroplastic/chromoplastic
PGSC0003DMG400019611	4	Pectin methylesterase 1
PGSC0003DMG400031405	4	NRC1
PGSC0003DMG400012329	4	BEL14 protein
PGSC0003DMG400007297	4	Protein phosphatase-2C
PGSC0003DMG400019386	4	Phenylalanine ammonia-lyase
PGSC0003DMG400031113	4	3-hydroxyisobutyrate dehydrogenase
PGSC0003DMG400029885	4	Kinase
PGSC0003DMG400024561	4	Ser/Thr protein kinase
PGSC0003DMG400022058	4	DNA binding protein
PGSC0003DMG400009941	4	Receptor protein kinase CLAVATA1
PGSC0003DMG400006283	4	Multidrug resistance-associated protein 2, 6 (Mrp2, 6), abc-transoprter
PGSC0003DMG400028132	4	Transferase, transferring glycosyl groups
PGSC0003DMG400003102	4	L-galactose dehydrogenase
PGSC0003DMG400025132	4	KH domain-containing protein
PGSC0003DMG400030565	4	Fructose-bisphosphate aldolase
PGSC0003DMG400009317	4	Phosphoribulokinase
PGSC0003DMG400015919	4	ARF8
PGSC0003DMG400018587	4	4-amino-4-deoxychorismate lyase
PGSC0003DMG400022624	4	Glutathione s-transferase
PGSC0003DMG400010086	4	BIPINNATA
PGSC0003DMG400005325	4	Transcription factor
PGSC0003DMG400027986	4	Copper ion binding protein
PGSC0003DMG400000350	4	Zinc finger CCCH domain-containing protein 20
PGSC0003DMG400017298	4	Xyloglucan endotransglucosylase-hydrolase XTH9
PGSC0003DMG400011499	4	L-allo-threonine aldolase
PGSC0003DMG400009213	4	Sucrose transport protein
PGSC0003DMG400026107	4	Neutral/alkaline invertase
PGSC0003DMG400004314	4	N6-adenosine-methyltransferase 70 kDa subunit
PGSC0003DMG400022701	4	BTB-POZ and MATH domain protein
PGSC0003DMG400008091	4	Conserved gene of unknown function
PGSC0003DMG400010264	4	Transferase, transferring glycosyl groups
PGSC0003DMG400022606	4	WRKY domain class transcription factor
PGSC0003DMG400009936	4	Beta-fructofuranosidase
PGSC0003DMG400024503	4	1-deoxy-D-xylulose-5-phosphate reductoisomerase
PGSC0003DMG401022197	4	Polygalacturonase inhibitor protein
PGSC0003DMG400028520	4	WRKY transcription factor 1
PGSC0003DMG400004436	4	Triosephosphate isomerase, chloroplastic
PGSC0003DMG400015130	4	Defensin P322
PGSC0003DMG400026359	4	Glucan endo-1,3-beta-glucosidase
PGSC0003DMG400031099	4	Endosomal P24A protein
PGSC0003DMG400012066	4	DNA binding protein
PGSC0003DMG400017387	4	Conserved gene of unknown function
PGSC0003DMG400013102	4	Leucyl-tRNA synthetase
PGSC0003DMG400027017	4	Fructokinase 2
PGSC0003DMG400029091	4	1-deoxyxylulose-5-phosphate synthase
PGSC0003DMG400009417	4	Kinase
PGSC0003DMG400021341	4	Sucrose-phosphatase 1
PGSC0003DMG401028079	4	N-acetylglucosamine kinase
PGSC0003DMG400026641	4	Importin beta-1
PGSC0003DMG400025658	4	Conserved gene of unknown function
PGSC0003DMG400015952	4	Glucose-1-phosphate adenylyltransferase
PGSC0003DMG400029022	4	Aminotransferase ybdL
PGSC0003DMG401023631	4	Lipid binding protein
PGSC0003DMG401005575	4	DNA-binding protein
PGSC0003DMG400024824	4	Glycosyltransferase, CAZy family GT8
PGSC0003DMG400008267	4	CYP72A54
PGSC0003DMG400024300	4	Transmembrane emp24 domain-containing protein 10
PGSC0003DMG400017394	4	Glucose-6-phosphate 1-dehydrogenase, chloroplastic
PGSC0003DMG400011458	4	Peroxidase 40
PGSC0003DMG400008456	4	OBERON
PGSC0003DMG400011772	4	Mannose-6-phosphate isomerase
PGSC0003DMG401005954	4	Conserved gene of unknown function
PGSC0003DMG402025083	4	Peroxidase
PGSC0003DMG400024703	4	SRC2
PGSC0003DMG400011128	4	Gene of unknown function
PGSC0003DMG400013975	4	Xyloglucan endotransglycosylase/hydrolase XTH-6
PGSC0003DMG400010664	4	1,4-alpha-glucan-maltohydrolase
PGSC0003DMG400030059	4	RNA recognition motif-containing protein
PGSC0003DMG400027809	4	Electron transporter
PGSC0003DMG400015806	4	Serine/threonine-protein kinase PBS1
PGSC0003DMG400018461	4	Resistance gene
PGSC0003DMG400028348	4	Ribulose-1,5 bisphosphate carboxylase/oxygenase large subunit N-methyltransferase, chloroplastic
PGSC0003DMG400028009	4	Conserved gene of unknown function
PGSC0003DMG400008492	4	Polygalacturonase inhibiting protein
PGSC0003DMG400005593	4	Regulator of chromosome condensation/beta-lactamase-inhibitor protein II
PGSC0003DMG400027740	4	Auxin-induced protein 5NG4
PGSC0003DMG400016059	4	Gene of unknown function
PGSC0003DMG400027263	4	Serine carboxypeptidase-like 27
PGSC0003DMG400028491	4	CBL-interacting protein kinase 6
PGSC0003DMG400028261	4	Fructose-bisphosphate aldolase
PGSC0003DMG400015726	4	Glutathione s-transferase
PGSC0003DMG400018248	4	Receptor kinase 3
PGSC0003DMG400028347	4	Axi 1 protein from Nicotiana tabacum
PGSC0003DMG401009429	4	Uroporphyrinogen-III synthase
PGSC0003DMG400027201	4	26S proteasome subunit
PGSC0003DMG400002387	4	O-methyltransferase
PGSC0003DMG400019279	4	Conserved gene of unknown function
PGSC0003DMG400024392	3	Chorismate synthase 1, chloroplastic
PGSC0003DMG400006506	3	Cysteine synthase
PGSC0003DMG400006701	3	ABI3-interacting protein 3
PGSC0003DMG400011580	3	BRASSINOSTEROID INSENSITIVE 1
PGSC0003DMG402027680	3	Auxilin
PGSC0003DMG400015409	3	Serine/threonine-protein kinase PBS1
PGSC0003DMG401003179	3	Conserved gene of unknown function
PGSC0003DMG400024055	3	Nematode resistance
PGSC0003DMG400020386	3	Potassium transporter
PGSC0003DMG400000625	3	Signal recognition particle 54 kDa protein 1
PGSC0003DMG400008551	3	Homomeric Acetyl-CoA Carboxylase (Hom-ACCase)
PGSC0003DMG400017809	3	Oxidoreductase
PGSC0003DMG401031037	3	ATP binding protein
PGSC0003DMG400032200	3	1,3-beta-glucan synthase
PGSC0003DMG400026744	3	Glycogen synthase kinase-3 beta
PGSC0003DMG400006563	3	ATP binding protein
PGSC0003DMG400031471	3	Leucine-rich repeat family protein
PGSC0003DMG400020683	3	Conserved gene of unknown function
PGSC0003DMG400014093	3	Flavonol synthase
PGSC0003DMG400002689	3	Receptor kinase
PGSC0003DMG400002388	3	ATP binding protein
PGSC0003DMG400031120	3	Glycine-rich protein A3
PGSC0003DMG400006097	3	GDP-mannose 3',5'-epimerase
PGSC0003DMG400031761	3	Fiber protein Fb2
PGSC0003DMG400028102	3	Nodulin
PGSC0003DMG400003527	3	Disease resistance protein RGA2
PGSC0003DMG400028068	3	Conserved gene of unknown function
PGSC0003DMG400018041	3	Conserved gene of unknown function
PGSC0003DMG400020050	3	Conserved gene of unknown function
PGSC0003DMG400007359	3	2-oxoglutarate/malate translocator, chloroplast
PGSC0003DMG400000342	3	Grave disease carrier protein
PGSC0003DMG400016826	3	NAD-dependent isocitrate dehydrogenase
PGSC0003DMG400007390	3	Beta-ketoacyl-CoA synthase
PGSC0003DMG400001912	3	Phosphoglucomutase
PGSC0003DMG400000579	3	Nascent polypeptide associated complex alpha subunit
PGSC0003DMG400017038	3	Gene of unknown function
PGSC0003DMG401017626	3	Alpha-amylase
PGSC0003DMG400000164	3	Cytidine/deoxycytidylate deaminase family protein
PGSC0003DMG400033696	3	MAPKK
PGSC0003DMG400019027	3	Sodium-bile acid cotransporter
PGSC0003DMG400004642	3	Lipoyl synthase, chloroplastic
PGSC0003DMG400027119	3	Ferritin
PGSC0003DMG400019810	3	Sphingosine phosphate lyase
PGSC0003DMG402018740	3	Xyloglucan endotransglucosylase/hydrolase 9
PGSC0003DMG400016711	3	Homeobox protein knotted-1-like LET6
PGSC0003DMG400009026	3	Glucose-1-phosphate adenylyltransferase
PGSC0003DMG400028694	3	Ethylene receptor homolog
PGSC0003DMG400025298	3	Pyruvate kinase, cytosolic isozyme
PGSC0003DMG400025585	3	ADP-ribosylation factor
PGSC0003DMG400022118	3	Phosphoglycerate kinase
PGSC0003DMG400013335	3	Alternative oxidase
PGSC0003DMG400018738	3	Calmodulin-binding protein
PGSC0003DMG400028516	3	Cytochrome c1-1, heme protein, mitochondrial
PGSC0003DMG400025725	3	Conserved gene of unknown function
PGSC0003DMG400003042	3	Osmotin
PGSC0003DMG400026168	3	DNA binding protein
PGSC0003DMG400002138	3	MYBR domain class transcription factor
PGSC0003DMG400012228	3	Alcohol dehydrogenase
PGSC0003DMG400026456	3	Malic enzyme
PGSC0003DMG400022931	3	Transcription factor BZIP1
PGSC0003DMG401011117	3	Leucine-rich repeat containing protein
PGSC0003DMG401022253	3	Transporter
PGSC0003DMG401006082	3	Conserved gene of unknown function
PGSC0003DMG400004065	3	ADP,ATP carrier protein
PGSC0003DMG400000803	3	Cytochrome B561 family protein
PGSC0003DMG400030950	3	Myo inositol monophosphatase
PGSC0003DMG400027902	3	Zinc finger protein
PGSC0003DMG400008546	3	Miraculin
PGSC0003DMG400025542	3	Vacuolar membrane ATPase subunit c''
PGSC0003DMG400001069	3	Protein phosphatase 2a, regulatory subunit
PGSC0003DMG400025801	3	Conserved gene of unknown function
PGSC0003DMG400014497	3	AP-2 complex subunit beta-1
PGSC0003DMG400006660	3	Cellulose synthase catalytic subunit
PGSC0003DMG400026888	3	Conserved gene of unknown function
PGSC0003DMG400009240	3	CSN5 protein
PGSC0003DMG400003748	3	Peroxidase
PGSC0003DMG400023942	3	Sorting nexin-4
PGSC0003DMG400022947	3	Uncharacterized aarF domain-containing protein kinase, chloroplastic
PGSC0003DMG400005335	3	Truncated NBS-LRR resistance protein
PGSC0003DMG400013180	3	Pentatricopeptide repeat-containing protein
PGSC0003DMG400030989	3	Sentrin/sumo-specific protease
PGSC0003DMG402016696	3	Eukaryotic translation initiation factor
PGSC0003DMG400023171	3	Cysteine synthase
PGSC0003DMG400011711	3	Conserved gene of unknown function
PGSC0003DMG400029406	3	Glyceraldehyde-3-phosphate dehydrogenase B subunit
PGSC0003DMG400001278	3	Electron carrier
PGSC0003DMG400007708	3	Cyclin dependent kinase inhibitor
PGSC0003DMG400007821	3	Endosomal P24A protein
PGSC0003DMG400022019	3	CBL-interacting protein kinase 08
PGSC0003DMG400013489	3	Leucine-rich repeat receptor-like kinase
PGSC0003DMG400032529	3	Phospholipase A1-Igamma3, chloroplastic
PGSC0003DMG400029870	3	KH domain-containing protein
PGSC0003DMG400028325	3	Heparanase
PGSC0003DMG400026230	3	Pentatricopeptide repeat-containing protein
PGSC0003DMG400016453	3	Secretory peroxidase
PGSC0003DMG400026248	3	GATA transcription factor
PGSC0003DMG400002313	3	Conserved gene of unknown function
PGSC0003DMG401016322	3	MATH domain containing protein
PGSC0003DMG400023590	3	14-3-3 protein isoform 20R
PGSC0003DMG400011208	3	Serine carboxypeptidase
PGSC0003DMG400005108	3	Conserved gene of unknown function
PGSC0003DMG400028032	3	WPP domain-associated protein
PGSC0003DMG400001732	3	Kinase
PGSC0003DMG400017035	3	RAPTOR1B
PGSC0003DMG400005571	3	NADH dehydrogenase
PGSC0003DMG400021003	3	Peptide methionine sulfoxide reductase
PGSC0003DMG400000295	3	Hexokinase 5
PGSC0003DMG400023440	3	Calcium dependent protein kinase
PGSC0003DMG400003516	3	Heat shock protein binding
PGSC0003DMG402017675	3	Binding protein
PGSC0003DMG400025307	3	Cinnamoyl-CoA reductase
PGSC0003DMG400030927	3	Hemoglobin
PGSC0003DMG400015098	3	GDP-mannose pyrophosphorylase
PGSC0003DMG400006662	3	Ci21A protein
PGSC0003DMG400028853	3	Callus-expressing factor
PGSC0003DMG400020149	3	Succinyl CoA ligase beta subunit
PGSC0003DMG400003057	3	Osmotin
PGSC0003DMG400023854	3	Conserved gene of unknown function
PGSC0003DMG400000861	3	AMP-activated protein kinase, gamma regulatory subunit
PGSC0003DMG400026552	3	Conserved gene of unknown function
PGSC0003DMG400030166	3	Eukaryotic translation initiation factor 2c
PGSC0003DMG400004366	3	Ptm1
PGSC0003DMG400001841	3	Ubiquitin-protein ligase
PGSC0003DMG400013286	3	Ubiquitin-protein ligase
PGSC0003DMG400031491	3	Molybdopterin cofactor sulfurase
PGSC0003DMG400004295	3	NBS-LRR protein
PGSC0003DMG400026700	3	Hydroxymethylglutaryl-CoA lyase, mitochondrial
PGSC0003DMG401023772	3	Phosphomethylpyrimidine kinase
PGSC0003DMG400000994	3	Calcium-dependent protein kinase 3
PGSC0003DMG400004159	3	ATP binding protein
PGSC0003DMG400018791	3	Protein GIGANTEA
PGSC0003DMG400021301	3	Conserved gene of unknown function
PGSC0003DMG400028021	3	Short chain alcohol dehydrogenase
PGSC0003DMG400029732	3	Auxin repressed/dormancy associated protein
PGSC0003DMG400010118	3	Hydroxyproline-rich glycoprotein family protein
PGSC0003DMG400003404	3	RING finger protein
PGSC0003DMG400004404	3	Expansin9
PGSC0003DMG400029633	3	26S proteasome subunit RPN2a
PGSC0003DMG400014931	3	50S ribosomal protein L7/L12
PGSC0003DMG400009178	3	Pectinesterase
PGSC0003DMG400008796	3	Basic 30 kDa endochitinase
PGSC0003DMG400016906	3	BZIP transcription factor BZI-2
PGSC0003DMG401024510	3	Enolase
PGSC0003DMG400004444	3	HAD superfamily protein involved in N-acetyl-glucosamine catabolism
PGSC0003DMG400013680	3	Pectinesterase
PGSC0003DMG400004459	3	Paramyosin
PGSC0003DMG400015379	3	Malate dehydrogenase
PGSC0003DMG402019187	3	Ethylene-forming-enzyme-like dioxygenase
PGSC0003DMG400002036	3	Conserved gene of unknown function
PGSC0003DMG400025099	3	PRF
PGSC0003DMG400027012	3	GDP-L-galactose phosphorylase
PGSC0003DMG400021398	3	Xyloglucan endotransglucosylase-hydrolase XTH7
PGSC0003DMG400001596	3	Putative neutral invertase
PGSC0003DMG400015910	3	Ubiquinol-cytochrome c reductase iron-sulfur subunit
PGSC0003DMG400013259	3	Nonsense-mediated mRNA decay protein
PGSC0003DMG400000896	3	Filament-like plant protein
PGSC0003DMG401016888	3	SCUTL2
PGSC0003DMG400003168	3	Root phototropism protein
PGSC0003DMG400023050	3	Kelch repeat-containing F-box family protein
PGSC0003DMG400010637	3	Lycopene beta cyclase, chloroplastic
PGSC0003DMG400013981	3	Proline transporter 2
PGSC0003DMG400026280	3	Aromatic amino acid decarboxylase 2
PGSC0003DMG400021186	3	Kinase
PGSC0003DMG400012093	3	Calcyclin-binding protein
PGSC0003DMG400006257	3	Basic helix-loop-helix family protein
PGSC0003DMG400010137	3	Cysteine protease inhibitor 1
PGSC0003DMG403015682	3	Bacterial spot disease resistance protein 4
PGSC0003DMG400016010	3	Amino acid binding protein
PGSC0003DMG400000639	3	Delta 9 desaturase
PGSC0003DMG400013147	3	Cell division protein kinase
PGSC0003DMG400021985	3	Gene of unknown function
PGSC0003DMG400020317	3	Glycosyltransferase
PGSC0003DMG400018930	3	Proteinase inhibitor I4, serpin
PGSC0003DMG400020603	3	Alpha amylase
PGSC0003DMG400034305	3	F-box family protein
PGSC0003DMG400005825	3	ACC synthase
PGSC0003DMG400001388	3	Glycosyltransferase QUASIMODO1
PGSC0003DMG400019157	3	SLT1 protein
PGSC0003DMG400005419	3	RAB11G
PGSC0003DMG400004789	3	Multicopper oxidase
PGSC0003DMG400004542	3	Cytochrome P450
PGSC0003DMG400009891	3	Alpha-amylase
PGSC0003DMG400003874	3	Splicing factor 3A subunit
PGSC0003DMG400015693	3	Resistance gene
PGSC0003DMG402015792	3	Short-chain dehydrogenase
PGSC0003DMG400023084	3	LMBR1 integral membrane family protein
PGSC0003DMG400010454	3	Transitional endoplasmic reticulum ATPase
PGSC0003DMG400006146	3	CONSTANS interacting protein 6
PGSC0003DMG400016657	3	ATP binding protein
PGSC0003DMG400024457	3	Conserved gene of unknown function
PGSC0003DMG400031412	3	Endomembrane protein emp70
PGSC0003DMG400014607	3	Aspartyl protease family protein
PGSC0003DMG400024346	3	Ripening regulated protein
PGSC0003DMG400024801	3	Zinc finger CCCH domain-containing protein 55
PGSC0003DMG400016038	3	Polygalacturonase
PGSC0003DMG402019252	3	Receptor kinase THESEUS 1
PGSC0003DMG401015901	3	Stromal antigen
PGSC0003DMG400013629	3	Cytochrome P450 hydroxylase
PGSC0003DMG400019963	3	ATP binding protein
PGSC0003DMG400030219	3	Chlorophyll b reductase
PGSC0003DMG400003133	3	Pentatricopeptide repeat-containing protein
PGSC0003DMG400014877	3	BZIP domain class transcription factor
PGSC0003DMG400014936	3	Zinc/iron transporter
PGSC0003DMG400016363	2	Transcription factor TCP7
PGSC0003DMG400030633	2	Pyruvate decarboxylase
PGSC0003DMG400002324	2	Plastid high chlorophyll fluorescence 136
PGSC0003DMG400010713	2	Salt responsive protein 2
PGSC0003DMG400017556	2	Photosystem II 22 kDa protein, chloroplastic
PGSC0003DMG402016404	2	RNase H domain-containing protein
PGSC0003DMG400027768	2	Cop11 protein
PGSC0003DMG400029146	2	Receptor protein kinase CLAVATA1
PGSC0003DMG400003238	2	Malic enzyme
PGSC0003DMG402011946	2	KAK (KAKTUS) isoform 1
PGSC0003DMG400020785	2	Conserved gene of unknown function
PGSC0003DMG400010386	2	Malate dehydrogenase
PGSC0003DMG403011138	2	Gene of unknown function
PGSC0003DMG400001915	2	Flavonoid 3-hydroxylase
PGSC0003DMG400012653	2	LOB domain-containing protein 41
PGSC0003DMG400000890	2	Calcium-dependent protein kinase
PGSC0003DMG400001887	2	TLD family protein
PGSC0003DMG400015546	2	Endoplasmic reticulum [ER]-type calcium ATPase
PGSC0003DMG400003363	2	DNA double-strand break repair rad50 ATPase
PGSC0003DMG401007628	2	Polyribonucleotide nucleotidyltransferase
PGSC0003DMG400005642	2	40S ribosomal protein S7
PGSC0003DMG400004359	2	Pentatricopeptide repeat-containing protein
PGSC0003DMG400003896	2	Peptidyl-prolyl cis-trans isomerase cyclophilin-type family protein
PGSC0003DMG400014673	2	Dimethylaniline monooxygenase
PGSC0003DMG400028134	2	Sucrose-phosphatase
PGSC0003DMG400015342	2	Jasmonic acid 2
PGSC0003DMG400006160	2	Fasciclin-like arabinogalactan protein 2
PGSC0003DMG400005804	2	Ubiquitin-protein ligase
PGSC0003DMG400001227	2	Gibberellin regulated protein
PGSC0003DMG400026648	2	Ubiquitin-activating enzyme E1
PGSC0003DMG400012966	2	Dihydrolipoyllysine-residue acetyltransferase component of pyruvate dehydrogenase
PGSC0003DMG400019371	2	Permease I
PGSC0003DMG400008622	2	D1 protease
PGSC0003DMG400029498	2	PLE
PGSC0003DMG400030701	2	NGMTP1
PGSC0003DMG402016146	2	ATP-dependent RNA helicase
PGSC0003DMG400023954	2	Prenylated Rab acceptor protein
PGSC0003DMG400017734	2	Transcription factor
PGSC0003DMG400016208	2	6-phosphofructokinase 5, chloroplastic
PGSC0003DMG400016813	2	Chaperone binding protein
PGSC0003DMG400027555	2	Conserved gene of unknown function
PGSC0003DMG400012670	2	Gene of unknown function
PGSC0003DMG400003942	2	Conserved gene of unknown function
PGSC0003DMG400020649	2	Cytochrome b-c1 complex subunit 8
PGSC0003DMG400043394	2	Conserved gene of unknown function
PGSC0003DMG400000988	2	Synovial sarcoma associated ss18 protein
PGSC0003DMG400026460	2	DNA binding protein
PGSC0003DMG400016002	2	Small GTP-binding protein
PGSC0003DMG401018603	2	Signal transducer
PGSC0003DMG400015458	2	Lrr receptor protein kinase
PGSC0003DMG400018263	2	Serine/threonine-protein kinase PBS1
PGSC0003DMG400025528	2	NTGP4
PGSC0003DMG400023915	2	Lung seven transmembrane receptor
PGSC0003DMG400020699	2	Isoamylase isoform 1
PGSC0003DMG401013075	2	Conserved gene of unknown function
PGSC0003DMG400019402	2	Translation initiation factor
PGSC0003DMG402001978	2	Pyridine nucleotide-disulfide oxidoreductase family protein
PGSC0003DMG400032791	2	Casein kinase
PGSC0003DMG400008496	2	AMP deaminase
PGSC0003DMG400026598	2	Conserved gene of unknown function
PGSC0003DMG400007514	2	Glycolate oxidase
PGSC0003DMG400025866	2	Stress-enhanced protein 1
PGSC0003DMG400018462	2	Disease resistance protein
PGSC0003DMG400008388	2	Beta-fructosidase (Beta-fructofuranosidase)
PGSC0003DMG400028845	2	Ovule receptor-like kinase 28
PGSC0003DMG400006084	2	Conserved gene of unknown function
PGSC0003DMG400013943	2	Conserved gene of unknown function
PGSC0003DMG400019363	2	Ribosome-recycling factor, chloroplastic
PGSC0003DMG400024484	2	BAH domain-containing protein
PGSC0003DMG400001190	2	Conserved gene of unknown function
PGSC0003DMG400021550	2	Adenosine kinase isoform 1T
PGSC0003DMG400016521	2	Hexokinase
PGSC0003DMG400018236	2	Pectinacetylesterase
PGSC0003DMG400005847	2	Kinesin light chain
PGSC0003DMG400013813	2	Protein arginine n-methyltransferase
PGSC0003DMG400001070	2	Acyl-ACP thioesterase B
PGSC0003DMG400017049	2	DNA binding protein
PGSC0003DMG400003959	2	Maspardin
PGSC0003DMG400016230	2	Conserved gene of unknown function
PGSC0003DMG400010437	2	Structural constituent of ribosome
PGSC0003DMG400013090	2	Leucine-rich repeat-containing protein
PGSC0003DMG400025887	2	Thioredoxin M3, chloroplastic
PGSC0003DMG400021002	2	Mago nashi 2
PGSC0003DMG400009928	2	Conserved gene of unknown function
PGSC0003DMG400004379	2	Esterase
PGSC0003DMG400000935	2	Phosphoglycerate mutase
PGSC0003DMG400021513	2	SBT1 protein
PGSC0003DMG400015872	2	NBS-LRR type resistance protein
PGSC0003DMG400003266	2	Methyltransferase
PGSC0003DMG400002167	2	Glutathion S-transferase
PGSC0003DMG400019873	2	Phytoalexin-deficient 4-2 protein
PGSC0003DMG400008493	2	Receptor ser thr protein kinase
PGSC0003DMG400014457	2	Glucan endo-1,3-beta-glucosidase
PGSC0003DMG400022869	2	Membrane protein
PGSC0003DMG400016695	2	Chlorophyll a-b binding protein 50, chloroplastic
PGSC0003DMG400001369	2	Kinase
PGSC0003DMG400011811	2	Ferredoxin--NADP reductase, root-type isozyme, chloroplastic
PGSC0003DMG400011950	2	Chloroplast ferredoxin I
PGSC0003DMG402024041	2	Shikimate dehydrogenase
PGSC0003DMG400011175	2	CBL-interacting serine/threonine-protein kinase
PGSC0003DMG400031257	2	60S ribosomal protein L34
PGSC0003DMG400011872	2	Glucosyltransferase
PGSC0003DMG400018527	2	Nucleic acid binding protein
PGSC0003DMG401027812	2	Heat shock factor
PGSC0003DMG400011210	2	Conserved gene of unknown function
PGSC0003DMG400027052	2	Kunitz trypsin inhibitor
PGSC0003DMG400018313	2	Pre-mRNA splicing factor
PGSC0003DMG400000816	2	Tospovirus resistance protein A
PGSC0003DMG402024210	2	26S proteasome subunit RPN7
PGSC0003DMG400023198	2	Leucine-rich repeat-containing protein
PGSC0003DMG400020802	2	Peptidylprolyl isomerase
PGSC0003DMG400030169	2	Leucine-rich repeat family protein
PGSC0003DMG400001953	2	AP-1 complex subunit gamma-2
PGSC0003DMG400013729	2	Clathrin binding protein
PGSC0003DMG400024102	2	F-box family protein
PGSC0003DMG400002328	2	Adipocyte plasma membrane-associated protein
PGSC0003DMG400009095	2	Multidrug resistance-associated protein 1, 3 (Mrp1, 3), abc-transoprter
PGSC0003DMG400033646	2	Beta-galactosidase
PGSC0003DMG400001315	2	Calmodulin binding protein
PGSC0003DMG400013749	2	MAP kinase activating protein
PGSC0003DMG400004020	2	Zeaxanthin epoxidase, chloroplastic
PGSC0003DMG400009887	2	Phospholipase D delta
PGSC0003DMG400003539	2	Aldehyde dehydrogenase
PGSC0003DMG400006416	2	5'-adenylylsulfate reductase-like 4
PGSC0003DMG400011690	2	Lysine/histidine transporter
PGSC0003DMG400009712	2	Hydrolase, acting on ester bonds
PGSC0003DMG400013579	2	Beta-ketoacyl-ACP synthase II
PGSC0003DMG400008712	2	EIL2
PGSC0003DMG401000923	2	NIM1 2
PGSC0003DMG400002143	2	Pumilio
PGSC0003DMG400005418	2	Dopamine beta-monooxygenase
PGSC0003DMG400004383	2	Ceramidase
PGSC0003DMG400005456	2	Protein phosphatase 2c
PGSC0003DMG400023995	2	Trehalose-6-phosphate synthase
PGSC0003DMG400029372	2	UDP-sugar transporter
PGSC0003DMG400009282	2	Protein MYG1
PGSC0003DMG402026315	2	Ring finger protein
PGSC0003DMG401028027	2	FK506 binding protein
PGSC0003DMG400032243	2	Homocysteine s-methyltransferase
PGSC0003DMG400009014	2	WRKY transcription factor IIe-1
PGSC0003DMG400014873	2	Conserved gene of unknown function
PGSC0003DMG400028959	2	Multicopper oxidase
PGSC0003DMG400015809	2	Glycine-rich protein
PGSC0003DMG400015645	2	GDP-mannose pyrophosphorylase
PGSC0003DMG400024057	2	PRLI-interacting factor A
PGSC0003DMG400018108	2	FKBP12-interacting protein of 37 kDa
PGSC0003DMG400010174	2	Peroxisomal membrane 22 kDa family protein
PGSC0003DMG400012190	2	Transferase, transferring glycosyl groups
PGSC0003DMG400003309	2	MFP1 attachment factor 1
PGSC0003DMG400026489	2	Surface antigen protein
PGSC0003DMG400001685	2	Acyl carrier protein
PGSC0003DMG400011285	2	Pentatricopeptide repeat-containing protein
PGSC0003DMG400019410	2	Heavy metal-associated domain containing protein
PGSC0003DMG400014261	2	CDPK
PGSC0003DMG401023454	2	Biotin carboxylase carrier protein
PGSC0003DMG400016110	2	Binding protein
PGSC0003DMG400016715	2	Expansin
PGSC0003DMG400003548	2	Fructose-bisphosphate aldolase
PGSC0003DMG400020491	2	GATA transcription factor
PGSC0003DMG401029469	2	Cleavage and polyadenylation specificity factor
PGSC0003DMG400025335	2	Hypersensitive-induced reaction protein
PGSC0003DMG400001555	2	Aspartyl/glutamyl-tRNA(Asn/Gln) amidotransferase subunit B
PGSC0003DMG400018987	2	Red chlorophyll catabolite reductase
PGSC0003DMG402018552	2	Soluble starch synthase 1, chloroplastic/amyloplastic
PGSC0003DMG400019737	2	Serine/threonine protein kinase
PGSC0003DMG400005494	2	Gulonolactone oxidase
PGSC0003DMG400029962	2	Peptide deformylase 1A, chloroplastic
PGSC0003DMG400015070	2	Mitochondrial transcription termination factor
PGSC0003DMG402028933	2	Succinate/fumarate mitochondrial transporter
PGSC0003DMG400007100	2	Conserved gene of unknown function
PGSC0003DMG400010842	2	Conserved gene of unknown function
PGSC0003DMG400010931	2	DNA binding protein
PGSC0003DMG400013179	2	Phytol kinase 1, chloroplast
PGSC0003DMG400000737	2	Diaminopimelate decarboxylase 1, chloroplastic
PGSC0003DMG400008917	2	Heat shock protein 70
PGSC0003DMG400019971	2	Circadian clock-associated FKF1
PGSC0003DMG400029412	2	Alcohol dehydrogenase ADH
PGSC0003DMG400010445	2	Serine/threonine protein kinase
PGSC0003DMG400008553	2	Cellulase containing protein
PGSC0003DMG400025192	2	Dehydration-responsive protein RD22
PGSC0003DMG402028586	2	Mevalonate kinase
PGSC0003DMG400009471	2	Conserved gene of unknown function
PGSC0003DMG400007582	2	Cytochrome P450
PGSC0003DMG400029941	2	Green ripe-like 1
PGSC0003DMG400014824	2	Glycerol-3-phosphate transporter
PGSC0003DMG400023670	2	Ubiquitin-protein ligase
PGSC0003DMG400024208	2	Neighbor of COX4
PGSC0003DMG400012696	2	Calcium ATPase
PGSC0003DMG400026338	2	Sec23/sec24 transport family protein
PGSC0003DMG400033683	2	Dehydrogenase
PGSC0003DMG400001099	2	Chloroplast lipocalin
PGSC0003DMG400023024	2	UDP-n-acteylglucosamine pyrophosphorylase
PGSC0003DMG400019149	2	Ribulose bisphosphate carboxylase/oxygenase activase, chloroplastic
PGSC0003DMG400020807	2	Transcription factor
PGSC0003DMG400005269	2	Glucose-6-phosphate/phosphate translocator 2
PGSC0003DMG400006700	2	Conserved gene of unknown function
PGSC0003DMG400026745	2	Conserved gene of unknown function
PGSC0003DMG400027853	2	Acyltransferase
PGSC0003DMG400010877	2	Gene of unknown function
PGSC0003DMG400006550	2	Auxin influx transport protein
PGSC0003DMG400028951	2	Aconitase
PGSC0003DMG400013982	2	Proline transporter 1
PGSC0003DMG402025422	2	Conserved gene of unknown function
PGSC0003DMG401028895	2	Conserved gene of unknown function
PGSC0003DMG400026574	2	Myosin heavy chain
PGSC0003DMG400031356	2	Conserved gene of unknown function
PGSC0003DMG400027744	2	Protein kinase APK1B, chloroplast
PGSC0003DMG400008394	2	Cc-nbs-lrr resistance protein
PGSC0003DMG400026695	2	GTPase
PGSC0003DMG400032780	2	Conserved gene of unknown function
PGSC0003DMG400012510	2	Exosome complex exonuclease rrp42
PGSC0003DMG400022786	2	Plasmalemma Na+/H+ antiporter
PGSC0003DMG400027599	2	Transcription factor RF2b
PGSC0003DMG400029059	2	Poly(A) polymerase
PGSC0003DMG400028243	2	40S ribosomal protein S17
PGSC0003DMG400004149	2	Cell division protein ftsH
PGSC0003DMG400009077	2	Spermine synthase
PGSC0003DMG401025624	2	Type-B response regulator
PGSC0003DMG400010836	2	Lupus la ribonucleoprotein
PGSC0003DMG400009994	2	Hexose transporter
PGSC0003DMG400031392	2	Anthranilate phosphoribosyltransferase
PGSC0003DMG400010805	2	GYF domain-containing protein
PGSC0003DMG400027791	2	Avr9 elicitor response protein
PGSC0003DMG401000056	2	BRASSINOSTEROID INSENSITIVE 1-associated receptor kinase 1
PGSC0003DMG400025300	2	Conserved gene of unknown function
PGSC0003DMG400020742	2	Aquaporin
PGSC0003DMG400004288	2	Ubiquitin ligase SINAT2
PGSC0003DMG401031379	2	Heat shock 70 kDa protein
PGSC0003DMG401025958	2	Glycine-rich protein
PGSC0003DMG402007274	2	Isoamylase isoform 3
PGSC0003DMG400005562	2	SIT4 phosphatase-associated family protein
PGSC0003DMG400026778	2	Conserved gene of unknown function
PGSC0003DMG400003088	2	Cell wall protein TIR4
PGSC0003DMG400000809	2	NAC domain protein
PGSC0003DMG400012947	2	Cytochrome P450 monooxygenase CYP736B
PGSC0003DMG400025336	2	Nitrate transporter NRT1-5
PGSC0003DMG402001013	2	DNA polymerase eta
PGSC0003DMG400018043	2	Protein phosphatase 2c
PGSC0003DMG400007315	2	H/ACA ribonucleoprotein complex subunit 4
PGSC0003DMG400020392	2	Pentatricopeptide repeat-containing protein
PGSC0003DMG400015892	2	Conserved gene of unknown function
PGSC0003DMG400025176	2	Non-symbiotic hemoglobin
PGSC0003DMG400013196	2	Prenylated Rab acceptor protein
PGSC0003DMG401028785	2	Kinase
PGSC0003DMG400003449	2	Thioredoxin
PGSC0003DMG400019398	2	Ubiquitin carrier protein
PGSC0003DMG400026300	2	Aromatic amino acid decarboxylase 2
PGSC0003DMG402000790	2	Mitochondrial carrier protein
PGSC0003DMG400015058	2	OJ990528_30.1 protein
PGSC0003DMG400031169	2	Conserved gene of unknown function
PGSC0003DMG400011370	2	Rubber elongation factor
PGSC0003DMG400000968	2	Conserved gene of unknown function
PGSC0003DMG400023187	2	Conserved gene of unknown function
PGSC0003DMG401030647	2	DegP protease
PGSC0003DMG400026918	2	CSN5 protein
PGSC0003DMG400017149	2	Conserved gene of unknown function
PGSC0003DMG400017881	2	Conserved gene of unknown function
PGSC0003DMG400020500	2	Ubiquitin family protein
PGSC0003DMG402007635	2	Ribonuclease z, chloroplast
PGSC0003DMG400025390	2	Apetala 2
PGSC0003DMG400004607	2	Yth domain-containing protein
PGSC0003DMG400025257	2	Eukaryotic translation initiation factor 3 subunit
PGSC0003DMG400010788	2	Fructose-1,6-bisphosphatase, cytosolic
PGSC0003DMG400002675	2	Fructose-bisphosphate aldolase
PGSC0003DMG400001992	2	Disease resistance protein BS2
PGSC0003DMG400014467	2	Inositol polyphosphate multikinase
PGSC0003DMG400030851	2	ATP-dependent Clp protease proteolytic subunit
PGSC0003DMG400007012	2	Ubiquitin ligase SINAT3
PGSC0003DMG400021863	2	Nucleotide binding site-leucine rich repeat protein
PGSC0003DMG400031223	2	Lung seven transmembrane receptor family protein
PGSC0003DMG400009907	2	WD40 repeat protein
PGSC0003DMG400033639	2	Ethylene-responsive RNA helicase
PGSC0003DMG400023032	2	Phosphoribosylformylglycinamidine cyclo-ligase
PGSC0003DMG400008322	2	Starch synthase IV
PGSC0003DMG400017678	2	CTD phosphatase
PGSC0003DMG400007026	2	DnaJ homolog protein
PGSC0003DMG400015800	2	Ubiquitin-protein ligase
PGSC0003DMG400027781	2	Conserved gene of unknown function
PGSC0003DMG402018896	2	Transcription factor
PGSC0003DMG401003209	2	RNA-binding protein
PGSC0003DMG400010718	2	GDSL-motif lipase/hydrolase family protein
PGSC0003DMG400016820	2	Calcium-dependent protein kinase 4
PGSC0003DMG402009395	2	26S proteasome regulatory subunit rpn1
PGSC0003DMG400010352	2	Lecithine cholesterol acyltransferase
PGSC0003DMG400015622	2	Class II knotted-like homeobox protein
PGSC0003DMG400026820	2	Aminotransferase family protein
PGSC0003DMG400029505	2	NRC1
PGSC0003DMG400027624	2	Phosphoglycerate dehydrogenase
PGSC0003DMG401026622	2	Nudix hydrolase 15, mitochondrial
PGSC0003DMG400001205	2	Conserved gene of unknown function
PGSC0003DMG400006441	2	Histone H2A
PGSC0003DMG400025927	2	Conserved gene of unknown function
PGSC0003DMG400000735	2	Glucose-1-phosphate adenylyltransferase
PGSC0003DMG400007176	2	Auxin-induced protein 5NG4
PGSC0003DMG400031391	2	ATP-dependent RNA helicase DB10
PGSC0003DMG401025510	2	Adaptin ear-binding coat-associated protein
PGSC0003DMG400007614	2	Alternative oxidase
PGSC0003DMG400004938	2	Xylulose kinase
PGSC0003DMG400005267	2	Glutamate receptor 3 plant
PGSC0003DMG400013596	2	ADP,ATP carrier protein
PGSC0003DMG402018257	2	Leucine-rich repeat-containing protein
PGSC0003DMG400028701	2	Zinc finger protein
PGSC0003DMG400039752	2	Exocyst complex component
PGSC0003DMG400016915	2	Non-symbiotic hemoglobin 2
PGSC0003DMG400027919	2	Aspartate aminotransferase
PGSC0003DMG400013858	2	BCL-2-associated athanogene 7
PGSC0003DMG401028489	2	RNA splicing protein mrs2, mitochondrial
PGSC0003DMG400006613	2	Serine/threonine protein kinase
PGSC0003DMG400016227	2	Ubiquitin-protein ligase
PGSC0003DMG400007147	2	Conserved gene of unknown function
PGSC0003DMG401031322	2	Oligopeptide transporter
PGSC0003DMG400013161	2	Transducin family protein
PGSC0003DMG400025487	2	Isocitrate lyase
PGSC0003DMG400015356	2	NADPH:protochlorophyllide oxidoreductase
PGSC0003DMG400024449	2	26S proteasome subunit
PGSC0003DMG400027855	2	NAC domain protein
PGSC0003DMG400015551	2	Nudix hydrolase
PGSC0003DMG400029087	2	Cytochrome b-c1 complex subunit 7
PGSC0003DMG400037159	2	Leucine-rich repeat containing protein
PGSC0003DMG400009606	2	Casein kinase 1 4
PGSC0003DMG400011815	2	Conserved gene of unknown function
PGSC0003DMG401026661	2	SKIP interacting protein 10
PGSC0003DMG400020253	2	Ribonucleoside-diphosphate reductase small chain
PGSC0003DMG400012054	2	Gene of unknown function
PGSC0003DMG400011954	2	Non-specific lipid-transfer protein 1
PGSC0003DMG400008824	2	Armadillo/beta-catenin repeat family protein
PGSC0003DMG400017063	2	Blight resistance protein T118
PGSC0003DMG400031865	2	Zinc finger protein
PGSC0003DMG400003368	2	60S ribosomal protein L12
PGSC0003DMG400023660	2	RBP50
PGSC0003DMG400004421	2	Transferase, transferring glycosyl groups
PGSC0003DMG400000675	2	Dicer-1
PGSC0003DMG400019975	2	Ankyrin repeat-containing protein
PGSC0003DMG400001136	2	Clathrin coat assembly protein ap-1
PGSC0003DMG400004531	2	Endomembrane protein emp70
PGSC0003DMG400011909	2	Metacaspase 1
PGSC0003DMG400012621	2	Steroid nuclear receptor, ligand-binding
PGSC0003DMG400002386	2	Conserved gene of unknown function
PGSC0003DMG400017862	2	Potassium transporter 11
PGSC0003DMG400000724	2	Serine/threonine-protein kinase PBS1
PGSC0003DMG400009588	2	Cytoplasmic ribosomal protein S13
PGSC0003DMG400008787	2	Ferritin
PGSC0003DMG400011888	2	Conserved gene of unknown function
PGSC0003DMG400013644	2	Leucine-rich repeat-containing protein
PGSC0003DMG400011530	2	Glyceraldehyde-3-phosphate dehydrogenase A, chloroplastic
PGSC0003DMG400003357	2	CONSTANS interacting protein 2b
PGSC0003DMG402008055	2	SIT4 phosphatase-associated family protein
PGSC0003DMG401031123	2	Utp-glucose-1-phosphate uridylyltransferase
PGSC0003DMG400016552	2	Conserved gene of unknown function
PGSC0003DMG400016726	2	Pyrophosphate--fructose 6-phosphate 1-phosphotransferase subunit beta
PGSC0003DMG400031119	2	Stress-induced protein
PGSC0003DMG400002233	2	Conserved gene of unknown function
PGSC0003DMG400033642	2	2,4-dienoyl-CoA reductase
PGSC0003DMG402010918	2	Xyloglucan endotransglycosylase
PGSC0003DMG400027330	2	Self-pruning interacting protein 1
PGSC0003DMG400000926	2	Oxygen-evolving enhancer protein 2, chloroplastic
PGSC0003DMG400016880	2	Gene of unknown function
PGSC0003DMG400001084	2	Conserved gene of unknown function
PGSC0003DMG400017918	2	Glycine-rich protein
PGSC0003DMG400012974	2	Conserved gene of unknown function
PGSC0003DMG400021930	2	Villin headpiece; Gelsolin region
PGSC0003DMG400000791	2	Photoperiod responsive protein
PGSC0003DMG400010415	2	Sterol-C5(6)-desaturase homolog
PGSC0003DMG400008434	2	Conserved gene of unknown function
PGSC0003DMG400007227	2	Nodulin MtN3 family protein
PGSC0003DMG400012594	2	BRASSINOSTEROID INSENSITIVE 1-associated receptor kinase 1
PGSC0003DMG400030977	2	RNA-binding region RNP-1 and Splicing factor PWI family member protein
PGSC0003DMG400011891	2	NAC domain protein
PGSC0003DMG400000810	2	Serine-threonine protein kinase, plant-type
PGSC0003DMG402031379	2	Heat shock 70 kDa protein
PGSC0003DMG400027790	2	Dephospho-CoA kinase
PGSC0003DMG400020298	2	CBS domain-containing protein
PGSC0003DMG402006689	2	Gene of unknown function
PGSC0003DMG400009861	2	Plastidic hexokinase
PGSC0003DMG400021165	2	F-box family protein
PGSC0003DMG400016931	2	RCG54054
PGSC0003DMG400003584	2	Ubiquitin carrier protein
PGSC0003DMG400014532	2	Conserved gene of unknown function
PGSC0003DMG400017653	2	STY-L protein
PGSC0003DMG400021607	2	WD-repeat protein
PGSC0003DMG400027524	2	Conserved gene of unknown function
PGSC0003DMG400033668	2	RNaseP protein p30
PGSC0003DMG400001228	2	Cytochrome b5
PGSC0003DMG400007170	2	Conserved gene of unknown function
PGSC0003DMG403006611	2	Gene of unknown function
PGSC0003DMG400010801	2	Conserved gene of unknown function
PGSC0003DMG400030840	2	Ribonucleoprotein, chloroplast
PGSC0003DMG400010152	2	Integral membrane protein
PGSC0003DMG400003122	2	Heat shock 70 kDa protein, mitochondrial
PGSC0003DMG400004257	2	F-box family protein
PGSC0003DMG400030074	2	Eukaryotic translation initiation factor 3 subunit 4
PGSC0003DMG400006487	2	F-box family protein
PGSC0003DMG400019202	2	5-alpha-reductase
PGSC0003DMG403003285	2	Histone mRNA exonuclease 1
PGSC0003DMG400029872	2	Ornithine aminotransferase
PGSC0003DMG400015862	2	EMB2734
PGSC0003DMG400035559	2	Conserved gene of unknown function
PGSC0003DMG400030957	2	Cysteine proteinase
PGSC0003DMG400025149	2	Conserved gene of unknown function
PGSC0003DMG400021011	2	Ethylene-responsive nuclear protein
PGSC0003DMG401005482	2	E2F4,5
PGSC0003DMG400021311	2	Conserved gene of unknown function
PGSC0003DMG401001978	2	Uricase
PGSC0003DMG400017096	2	Ripening regulated protein
PGSC0003DMG400025967	2	Pectinesterase
PGSC0003DMG400011439	2	Group I late embryogenesis abundant protein
PGSC0003DMG403008663	2	D-lactate dehydrogenase
PGSC0003DMG400020418	2	Conserved gene of unknown function
PGSC0003DMG400025301	2	Splicing factor 3B subunit
PGSC0003DMG400009968	2	25 kDa protein dehydrin
PGSC0003DMG400029847	2	Dihydroneopterin aldolase
PGSC0003DMG400016576	2	ATGCN5
PGSC0003DMG400027125	2	Chloroplast sedoheptulose-1,7-bisphosphatase
PGSC0003DMG400027276	2	Mg protoporphyrin IX chelatase
PGSC0003DMG400000661	2	Protein disulfide isomerase family
PGSC0003DMG400027906	2	Adenylate kinase, chloroplastic
PGSC0003DMG400014901	2	Succinate dehydrogenase
PGSC0003DMG400002590	2	Beta-galactosidase
PGSC0003DMG400028926	2	Conserved gene of unknown function
PGSC0003DMG400022088	2	Transketolase, chloroplastic
PGSC0003DMG400017494	2	Bcr-associated protein, bap
PGSC0003DMG400002452	2	Big map kinase/bmk
PGSC0003DMG400028948	2	Membrane-associated zinc metalloprotease isoform 1
PGSC0003DMG400021256	2	Gamma-glutamylhydrolase 2
PGSC0003DMG400023211	2	Phospholipase C
PGSC0003DMG400018464	2	Disease resistance protein
PGSC0003DMG400006141	2	Ubiquitin fusion degradaton protein
PGSC0003DMG400009571	2	Protein kinase family protein
PGSC0003DMG402030641	2	ATP-dependent Clp protease proteolytic subunit
PGSC0003DMG400026430	2	Beta-galactosidase
PGSC0003DMG400025373	2	Cinnamoyl-CoA reductase
PGSC0003DMG400021665	2	Conserved gene of unknown function
PGSC0003DMG400026855	2	Endochitinase 4
PGSC0003DMG400018323	2	Lipoyl synthase, mitochondrial
PGSC0003DMG400017518	2	Zinc-binding protein
PGSC0003DMG400016721	2	Phytoene synthase 2
PGSC0003DMG400026029	2	Malate dehydrogenase
PGSC0003DMG400019257	2	Chloroplast thiazole biosynthetic protein
PGSC0003DMG400021766	2	Conserved gene of unknown function
PGSC0003DMG400018305	2	Ubiquitin conjugating enzyme
PGSC0003DMG400009729	2	SET domain containing protein
PGSC0003DMG400011359	2	Phototropic-responsive NPH3 family protein
PGSC0003DMG400023451	2	Cleft lip and palate transmembrane protein
PGSC0003DMG400025254	2	S-adenosyl-L-methionine-dependent uroporphyrinogen III methyltransferase
PGSC0003DMG402008605	2	Conserved gene of unknown function
PGSC0003DMG400007717	2	Alcohol dehydrogenase class III
PGSC0003DMG400031454	2	UDP-glucose:glucosyltransferase
PGSC0003DMG400021722	2	Conserved gene of unknown function
PGSC0003DMG400004153	2	Anthranilate synthase alpha subunit
PGSC0003DMG400005339	2	Conserved gene of unknown function
PGSC0003DMG400023708	2	Actin-58
PGSC0003DMG400015856	2	Conserved gene of unknown function
PGSC0003DMG400032110	2	Protein phosphatase 2c
PGSC0003DMG400007882	2	Eukaryotic peptide chain release factor subunit 1-1
PGSC0003DMG400012944	2	Cig3
PGSC0003DMG400009730	2	Calcium-binding pollen allergen
PGSC0003DMG400003807	2	Rrp4
PGSC0003DMG400032528	2	Conserved gene of unknown function
PGSC0003DMG400008317	2	Mitochondrial inner membrane protease subunit
PGSC0003DMG400029164	2	Hydroxyproline-rich glycoprotein family protein
PGSC0003DMG401004242	2	Conserved gene of unknown function
PGSC0003DMG400020325	2	Acetyl co-enzyme A carboxylase carboxyltransferase alpha subunit
PGSC0003DMG400008405	2	Conserved gene of unknown function
PGSC0003DMG400009343	2	Argininosuccinate lyase
PGSC0003DMG400010748	2	Conserved gene of unknown function
PGSC0003DMG400007268	2	Plastid isopentenyl diphosphate isomerase
PGSC0003DMG400021912	2	FH protein NFH2
PGSC0003DMG402027531	2	SAP domain containing protein
PGSC0003DMG400003316	2	Tuber-specific and sucrose-responsive element binding factor
PGSC0003DMG400016131	2	Conserved gene of unknown function
PGSC0003DMG400009071	2	Mitochondrial carrier protein
PGSC0003DMG400000783	2	Extensin
PGSC0003DMG402027184	2	ATP binding protein
PGSC0003DMG400016284	2	Ethylene receptor
PGSC0003DMG400022060	2	Hepatocellular carcinoma-associated antigen
PGSC0003DMG400030075	2	BRASSINOSTEROID INSENSITIVE 1-associated receptor kinase 1
PGSC0003DMG400027086	2	Ribosomal protein L41
PGSC0003DMG400006345	2	Mas-binding factor MBF3
PGSC0003DMG400003459	2	TRANSPARENT TESTA 1 protein
PGSC0003DMG400020924	2	3'-5' exonuclease
PGSC0003DMG400020842	2	Conserved gene of unknown function
PGSC0003DMG400015253	2	Glyceraldehyde-3-phosphate dehydrogenase
PGSC0003DMG402009429	2	Taz protein
PGSC0003DMG400022817	2	MdVOZ1 protein
PGSC0003DMG400010753	2	Ethylene response factor 5
PGSC0003DMG400020340	2	DNA binding protein
PGSC0003DMG400018104	2	Cell division cycle protein 48
PGSC0003DMG400013891	2	Resistance protein PSH-RGH6
PGSC0003DMG400030145	2	Gene of unknown function
PGSC0003DMG400025968	2	Golgi SNARE 12 protein
PGSC0003DMG400019897	2	Conserved gene of unknown function
PGSC0003DMG400018341	2	Conserved gene of unknown function
PGSC0003DMG400013546	2	Sucrose synthase 2
PGSC0003DMG400004277	2	Dead box ATP-dependent RNA helicase
PGSC0003DMG400006383	2	PB1 domain-containing protein
PGSC0003DMG400016790	2	Homeodomain-leucine zipper protein 56
PGSC0003DMG400012890	2	ATP/GTP/Ca++ binding protein
PGSC0003DMG400020827	2	Serine/threonine-protein phosphatase PP1 isozyme 1
PGSC0003DMG400017976	2	Reticuline oxidase
PGSC0003DMG400007897	1	Conserved gene of unknown function
PGSC0003DMG400029833	1	Calcium-binding allergen Ole e
PGSC0003DMG400016914	1	Self-pruning interacting protein 1
PGSC0003DMG400010438	1	ParB-like nuclease
PGSC0003DMG401024293	1	O-linked n-acetylglucosamine transferase, ogt
PGSC0003DMG400011641	1	CBL-interacting protein kinase 13
PGSC0003DMG400029978	1	Conserved gene of unknown function
PGSC0003DMG400013983	1	Wound/stress protein
PGSC0003DMG400010819	1	3-ketoacyl-CoA synthase 10
PGSC0003DMG400029857	1	Strictosidine synthase
PGSC0003DMG400026159	1	Ccd1
PGSC0003DMG400012195	1	Conserved gene of unknown function
PGSC0003DMG400031199	1	Cytochrome P450
PGSC0003DMG400027856	1	Geranylgeranyl pyrophosphate synthase 2
PGSC0003DMG400001080	1	GD3B
PGSC0003DMG400009773	1	Auxin response factor 19
PGSC0003DMG400008206	1	FtsH protease
PGSC0003DMG400029546	1	Class III peroxidase
PGSC0003DMG400030306	1	CCR4-NOT transcription complex subunit
PGSC0003DMG400015711	1	PAE
PGSC0003DMG401032547	1	Conserved gene of unknown function
PGSC0003DMG400001976	1	Myo-inositol oxygenase
PGSC0003DMG400022201	1	Serine/threonine-protein phosphatase
PGSC0003DMG400022860	1	Ccr4-associated factor
PGSC0003DMG402017622	1	Conserved gene of unknown function
PGSC0003DMG402030493	1	ATP-dependent helicase
PGSC0003DMG400016690	1	Ubiquitin-protein ligase
PGSC0003DMG400031065	1	Pectate lyase
PGSC0003DMG400013784	1	Retrotransposon protein, unclassified
PGSC0003DMG400015832	1	Ring finger containing protein
PGSC0003DMG400026212	1	Conserved gene of unknown function
PGSC0003DMG400000619	1	Nucleosome-binding protein
PGSC0003DMG400014765	1	Lipid binding protein
PGSC0003DMG400008598	1	Conserved gene of unknown function
PGSC0003DMG401015717	1	RNA exonuclease NGL1
PGSC0003DMG400037894	1	Aspartic proteinase nepenthesin-1
PGSC0003DMG400004975	1	Phosphopentothenoylcysteine decarboxylase
PGSC0003DMG400020471	1	Isoflavone reductase homolog
PGSC0003DMG400004659	1	UDP-D-glucuronic acid 4-epimerase
PGSC0003DMG400025008	1	Conserved gene of unknown function
PGSC0003DMG400001842	1	Lon protease homolog
PGSC0003DMG400022852	1	Xylosyl transferase
PGSC0003DMG400019701	1	26S proteasome subunit RPN5b
PGSC0003DMG400024213	1	DNA binding protein
PGSC0003DMG400029682	1	AP3-complex subunit beta-A
PGSC0003DMG402015209	1	NPK2
PGSC0003DMG400023148	1	Multidomain cyclophilin type peptidyl-prolyl cis-trans isomerase
PGSC0003DMG400026199	1	Beta-amylase
PGSC0003DMG400007336	1	40S ribosomal protein S15
PGSC0003DMG400021376	1	Exonuclease
PGSC0003DMG400021191	1	DNA-damage-repair/toleration protein DRT111, chloroplastic
PGSC0003DMG400004855	1	Glycylpeptide N-tetradecanoyltransferase
PGSC0003DMG400007496	1	Adenylate kinase isoenzyme 6
PGSC0003DMG400015005	1	Heavy metal-associated domain containing protein
PGSC0003DMG400022436	1	Serine/threonine-protein kinase PBS1
PGSC0003DMG402011377	1	UDP-glucuronate decarboxylase 3
PGSC0003DMG400017847	1	Ring finger protein
PGSC0003DMG400026516	1	Conserved gene of unknown function
PGSC0003DMG400021899	1	MADS-box protein 5
PGSC0003DMG400030232	1	Conserved gene of unknown function
PGSC0003DMG400004514	1	Beta 1,4 N-acetylglucosaminyltransferase
PGSC0003DMG400003310	1	F-box protein GID2
PGSC0003DMG400008978	1	Xyloglucanase inhibitor
PGSC0003DMG400001209	1	Beta-glucosidase
PGSC0003DMG400008442	1	SCL domain class transcription factor
PGSC0003DMG401028328	1	Ganglioside induced differentiation associated protein
PGSC0003DMG400009683	1	PPR1 protein
PGSC0003DMG400031755	1	Optic atrophy 3 protein
PGSC0003DMG400026632	1	Malonyltransferase
PGSC0003DMG402011138	1	1-acyl-sn-glycerol-3-phosphate acyltransferase
PGSC0003DMG400031087	1	UPF0497 membrane protein 11
PGSC0003DMG400017956	1	Protein cdcH
PGSC0003DMG400029791	1	DNA-directed RNA polymerase I/III subunits
PGSC0003DMG400011901	1	Conserved gene of unknown function
PGSC0003DMG400016101	1	Patellin-3
PGSC0003DMG400005826	1	Conserved gene of unknown function
PGSC0003DMG400000995	1	Phosphoribosylaminoimidazole carboxylase
PGSC0003DMG400002108	1	Glycine-rich protein TomR2
PGSC0003DMG400014552	1	Cysteinyl-tRNA synthetase
PGSC0003DMG400007223	1	GTP-binding protein
PGSC0003DMG400012185	1	2-C-methyl-D-erythritol 2,4-cyclodiphosphate synthase, chloroplastic
PGSC0003DMG400004233	1	Nodulin protein
PGSC0003DMG401000526	1	Calcium homeostasis regulator CHoR1
PGSC0003DMG400031256	1	ZF-HD homeobox protein
PGSC0003DMG400026909	1	Lysyl-tRNA synthetase
PGSC0003DMG402015686	1	NTA15 protein
PGSC0003DMG400025470	1	Aspartic proteinase nepenthesin-1
PGSC0003DMG400030715	1	Heparanase
PGSC0003DMG400029897	1	Aspartate aminotransferase
PGSC0003DMG401028717	1	Gene of unknown function
PGSC0003DMG400013720	1	Mildew resistance locus o 15
PGSC0003DMG400024925	1	Ribosome biogenesis protein bop1
PGSC0003DMG400015766	1	Phytochrome A
PGSC0003DMG400003929	1	C-4 methyl sterol oxidase
PGSC0003DMG400000774	1	RNA-binding protein
PGSC0003DMG400024167	1	TGB12K interacting protein 3
PGSC0003DMG400003553	1	GAGA-binding transcriptional activator BBR/BPC6
PGSC0003DMG400021883	1	Reverse transcriptase
PGSC0003DMG400001744	1	SAT5
PGSC0003DMG400014918	1	Conserved gene of unknown function
PGSC0003DMG400005331	1	WD-repeat protein
PGSC0003DMG400012701	1	Conserved gene of unknown function
PGSC0003DMG400012312	1	Atpob1
PGSC0003DMG400000757	1	Salicylic acid-binding protein 2
PGSC0003DMG400000513	1	Stachyose synthase
PGSC0003DMG400007713	1	Conserved gene of unknown function
PGSC0003DMG400022766	1	Protein kinase
PGSC0003DMG400017943	1	Nodulation receptor kinase
PGSC0003DMG400011161	1	WD-repeat protein
PGSC0003DMG400007379	1	Topbp1
PGSC0003DMG400012810	1	Scramblase family protein
PGSC0003DMG400027195	1	Speckle-type POZ protein
PGSC0003DMG400006391	1	Phosphoenolpyruvate carboxykinase
PGSC0003DMG400014345	1	Acyl-CoA synthetase
PGSC0003DMG400021542	1	CYP81B36
PGSC0003DMG400028961	1	Galactosyltransferase family protein
PGSC0003DMG400012665	1	Conserved gene of unknown function
PGSC0003DMG400021531	1	Conserved gene of unknown function
PGSC0003DMG400027434	1	CRS2-associated factor 1, chloroplastic
PGSC0003DMG400005256	1	ATP synthase subunit delta', mitochondrial
PGSC0003DMG400016769	1	Double WRKY type transfactor
PGSC0003DMG400030549	1	Conserved gene of unknown function
PGSC0003DMG400005367	1	Nucleic acid binding protein
PGSC0003DMG400015463	1	Ornithine carbamoyltransferase
PGSC0003DMG401004334	1	Pyruvate dehydrogenase
PGSC0003DMG400024301	1	Eukaryotic translation initiation factor 2c
PGSC0003DMG400032181	1	Conserved gene of unknown function
PGSC0003DMG400016698	1	SLL2-S9-protein
PGSC0003DMG400004995	1	Conserved gene of unknown function
PGSC0003DMG401021901	1	Conserved gene of unknown function
PGSC0003DMG400012129	1	Beta-amylase PCT-BMYI
PGSC0003DMG400027593	1	Conserved gene of unknown function
PGSC0003DMG400007556	1	AMP dependent ligase
PGSC0003DMG402028907	1	Heat shock protein 90
PGSC0003DMG400005752	1	Amidase
PGSC0003DMG400006610	1	Receptor serine-threonine protein kinase
PGSC0003DMG400005065	1	Anthocyanidin reductase
PGSC0003DMG400003655	1	Aspartic proteinase nepenthesin-1
PGSC0003DMG400015265	1	Phospholipase C 4
PGSC0003DMG400022983	1	Protein CHLOROPLAST IMPORT APPARATUS 2
PGSC0003DMG400026488	1	Conserved gene of unknown function
PGSC0003DMG400005742	1	Ring finger containing protein
PGSC0003DMG400007669	1	Ring finger protein
PGSC0003DMG400031295	1	4F5 protein family protein
PGSC0003DMG401031803	1	Cyclin-L1
PGSC0003DMG400024875	1	Conserved gene of unknown function
PGSC0003DMG400029999	1	Conserved gene of unknown function
PGSC0003DMG400001822	1	Conserved gene of unknown function
PGSC0003DMG400001078	1	Fatty acid hydroperoxide lyase
PGSC0003DMG400028611	1	Peroxisomal membrane protein pmp34
PGSC0003DMG400028856	1	Erect panical 2
PGSC0003DMG400011874	1	Conserved gene of unknown function
PGSC0003DMG400018670	1	Amino acid transporter
PGSC0003DMG400017397	1	Beta 1,2 N-acetylglucosaminyltransferase
PGSC0003DMG400040591	1	Potassium channel NKT1
PGSC0003DMG400008644	1	Programmed cell death protein
PGSC0003DMG400031519	1	Conserved gene of unknown function
PGSC0003DMG400035598	1	Conserved gene of unknown function
PGSC0003DMG400008504	1	Auxin influx transport protein
PGSC0003DMG400005104	1	Conserved gene of unknown function
PGSC0003DMG400016324	1	ATBET12
PGSC0003DMG400007963	1	WD-repeat protein
PGSC0003DMG401013639	1	RNA recognition motif-containing protein
PGSC0003DMG400012848	1	AO (L-ASPARTATE OXIDASE); L-aspartate oxidase
PGSC0003DMG400030196	1	Nuclear transport factor
PGSC0003DMG400001090	1	AT hook motif-containing protein
PGSC0003DMG400012155	1	Pathogenesis-induced protein
PGSC0003DMG400021613	1	Conserved gene of unknown function
PGSC0003DMG400012408	1	Protein phosphatase 2C
PGSC0003DMG400030913	1	Tuber-specific and sucrose-responsive element binding factor
PGSC0003DMG400032249	1	Non-specific lipid-transfer protein
PGSC0003DMG400022703	1	4-diphosphocytidyl-2-C-methyl-D-erythritol kinase, chloroplastic/chromoplastic
PGSC0003DMG400009705	1	Purine transporter
PGSC0003DMG402012981	1	Serine-threonine protein kinase, plant-type
PGSC0003DMG400025024	1	COL domain class transcription factor
PGSC0003DMG400007113	1	Fatty acyl-CoA reductase 3
PGSC0003DMG400027890	1	Conserved gene of unknown function
PGSC0003DMG400008437	1	Internal-motor kinesin
PGSC0003DMG400022716	1	Phospholipase A22
PGSC0003DMG400032153	1	Conserved gene of unknown function
PGSC0003DMG402028577	1	Gene of unknown function
PGSC0003DMG400021253	1	Mitogen-activated protein kinase
PGSC0003DMG400031465	1	Protein kinase atsik
PGSC0003DMG400030180	1	Pectate lyase family protein
PGSC0003DMG400005971	1	ATP binding protein
PGSC0003DMG402028569	1	Phosphoglycerate/bisphosphoglycerate mutase
PGSC0003DMG402028903	1	24 kDa seed maturation protein
PGSC0003DMG400012551	1	UDP-glucuronosyltransferase
PGSC0003DMG400026356	1	F1F0-ATPase inhibitor protein
PGSC0003DMG400032820	1	Protein phosphatase 2c
PGSC0003DMG400019273	1	Conserved gene of unknown function
PGSC0003DMG400012405	1	30S ribosomal protein S20
PGSC0003DMG400021089	1	DEAD-box ATP-dependent RNA helicase 9
PGSC0003DMG400006384	1	CBL-interacting serine/threonine-protein kinase
PGSC0003DMG400017532	1	Ferredoxin-2
PGSC0003DMG400009110	1	Heat shock protein binding protein
PGSC0003DMG400029573	1	Protein MOS2
PGSC0003DMG400000786	1	Dof zinc finger protein 9
PGSC0003DMG400023377	1	Transferase, transferring glycosyl groups
PGSC0003DMG400007289	1	Importin subunit alpha
PGSC0003DMG400019267	1	Serine/threonine-specific protein kinase
PGSC0003DMG400008462	1	E3 ubiquitin-protein ligase UPL5
PGSC0003DMG400010821	1	Nucleic acid binding protein
PGSC0003DMG400006280	1	Receptor protein kinase CLAVATA1
PGSC0003DMG400030880	1	DNA-directed RNA polymerase
PGSC0003DMG400006319	1	Beta-glucosidase 01
PGSC0003DMG400022615	1	Conserved gene of unknown function
PGSC0003DMG400006329	1	Extensin
PGSC0003DMG400004650	1	Chromatin remodeling complex subunit
PGSC0003DMG400043220	1	Mitochondrial import inner membrane translocase subunit Tim17 family protein
PGSC0003DMG400010448	1	UDP-N-acetylglucosamine pyrophosphorylase
PGSC0003DMG400010470	1	Subtilase
PGSC0003DMG400030664	1	Sporulation protein RMD5
PGSC0003DMG400028924	1	Transporter
PGSC0003DMG400046968	1	Pentatricopeptide repeat-containing protein
PGSC0003DMG400009461	1	RING finger
PGSC0003DMG400019409	1	Chromatin remodeling complex subunit
PGSC0003DMG400020514	1	Peptide transporter
PGSC0003DMG400028115	1	GrpE protein homolog
PGSC0003DMG400008378	1	BHLH domain class transcription factor
PGSC0003DMG400016462	1	Conserved gene of unknown function
PGSC0003DMG400013632	1	Conserved gene of unknown function
PGSC0003DMG400028142	1	Expp1 protein
PGSC0003DMG400031548	1	Conserved gene of unknown function
PGSC0003DMG400001496	1	Ras-GTPase-activating protein-binding protein
PGSC0003DMG400002236	1	Exostosin family protein
PGSC0003DMG400026072	1	Leucine-rich repeat transmembrane protein kinase
PGSC0003DMG400003429	1	Atypical receptor-like kinase 1
PGSC0003DMG400003083	1	COR414-TM1
PGSC0003DMG400014710	1	Enzyme of the cupin superfamily
PGSC0003DMG400023687	1	Ribosomal protein S9
PGSC0003DMG400033064	1	Conserved gene of unknown function
PGSC0003DMG400003171	1	Conserved gene of unknown function
PGSC0003DMG401028788	1	Inducer of CBF expression 2 protein
PGSC0003DMG400005788	1	Conserved gene of unknown function
PGSC0003DMG400018364	1	Conserved gene of unknown function
PGSC0003DMG402017902	1	Boron transporter
PGSC0003DMG400004957	1	Conserved gene of unknown function
PGSC0003DMG400006079	1	UPA18
PGSC0003DMG400021891	1	SP1L
PGSC0003DMG402017590	1	Calmodulin binding protein
PGSC0003DMG400021177	1	Dead box ATP-dependent RNA helicase
PGSC0003DMG400006678	1	Aspartate aminotransferase
PGSC0003DMG400026667	1	Isoform 2 of PsbP 2, chloroplastic
PGSC0003DMG400008459	1	Calcium-binding protein
PGSC0003DMG400000433	1	UDP-apiose/xylose synthase
PGSC0003DMG400027738	1	GTP-binding protein
PGSC0003DMG400008002	1	DCL protein
PGSC0003DMG400028501	1	Conserved gene of unknown function
PGSC0003DMG400020039	1	Succinate/fumarate mitochondrial transporter
PGSC0003DMG400000872	1	Protein kinase APK1B, chloroplast
PGSC0003DMG401027917	1	Gene of unknown function
PGSC0003DMG400002703	1	Monodehydroascorbate reductase
PGSC0003DMG400019522	1	Heat shock protein binding protein
PGSC0003DMG400028406	1	Zinc finger protein
PGSC0003DMG401023118	1	Cytochrome P450-type monooxygenase 97A29
PGSC0003DMG400019677	1	Elongation factor 1-alpha
PGSC0003DMG400018477	1	F-box protein
PGSC0003DMG400007760	1	Bet v I allergen family protein
PGSC0003DMG400009650	1	Proteasome subunit alpha type-5
PGSC0003DMG400036542	1	Conserved gene of unknown function
PGSC0003DMG400017453	1	Oligopeptidase
PGSC0003DMG400015536	1	MYB1-2
PGSC0003DMG401018962	1	Beta-amyrin synthase
PGSC0003DMG400026023	1	Nuc-1 negative regulatory protein preg
PGSC0003DMG401016617	1	Cytochrome P450
PGSC0003DMG402005881	1	Ferredoxin-3, chloroplast
PGSC0003DMG400001252	1	Leucine-rich repeat protein
PGSC0003DMG400012026	1	Conserved gene of unknown function
PGSC0003DMG400024972	1	Conserved gene of unknown function
PGSC0003DMG400016882	1	Ubiquitin-protein ligase
PGSC0003DMG400016640	1	Conserved gene of unknown function
PGSC0003DMG400012344	1	Phospholipid hydroperoxide glutathione peroxidase
PGSC0003DMG400005903	1	Serine/threonine-protein phosphatase BSL3
PGSC0003DMG400003468	1	Actin depolymerizing factor 3
PGSC0003DMG400045727	1	Gene of unknown function
PGSC0003DMG400029122	1	Histidine decarboxylase
PGSC0003DMG400002038	1	Kinase
PGSC0003DMG400011823	1	5'-nucleotidase surE
PGSC0003DMG400018216	1	TMV resistance protein N
PGSC0003DMG400039789	1	UDP-glucose glucosyltransferase
PGSC0003DMG400019909	1	Poly(RC)-binding protein
PGSC0003DMG400015473	1	Conserved gene of unknown function
PGSC0003DMG400008248	1	Wound-responsive AP2 like factor 2
PGSC0003DMG400018251	1	Conserved gene of unknown function
PGSC0003DMG400013524	1	Protein kinase family protein
PGSC0003DMG400020867	1	Conserved gene of unknown function
PGSC0003DMG400024217	1	Pseudo response regulator
PGSC0003DMG400004449	1	Selenoprotein T
PGSC0003DMG400014893	1	U1 small nuclear ribonucleoprotein 70 kDa
PGSC0003DMG400005484	1	Protein kinase family protein
PGSC0003DMG400013544	1	Lupeol synthase
PGSC0003DMG400026779	1	PAS/LOV protein A
PGSC0003DMG400025371	1	Myosin heavy chain
PGSC0003DMG400023968	1	ATVAMP727
PGSC0003DMG400028610	1	Protein YIPF1
PGSC0003DMG400013721	1	Plant disease resistant protein
PGSC0003DMG400015573	1	Purine permease
PGSC0003DMG400001630	1	Peptidyl-prolyl cis-trans isomerase
PGSC0003DMG400028840	1	KH domain-containing protein
PGSC0003DMG400013285	1	Inositol monophosphatase 3
PGSC0003DMG401009305	1	Disease resistance protein RGA3
PGSC0003DMG400013803	1	Serine-threonine protein kinase, plant-type
PGSC0003DMG400026913	1	NAD dependent epimerase/dehydratase
PGSC0003DMG400009963	1	Rop guanine nucleotide exchange factor
PGSC0003DMG400012099	1	WD domain containing protein
PGSC0003DMG400031473	1	S-adenosylmethionine-dependent methyltransferase
PGSC0003DMG400030058	1	MAP kinase
PGSC0003DMG400000628	1	Late embryogenesis abundant protein
PGSC0003DMG400005655	1	WD-repeat protein
PGSC0003DMG400007233	1	CXE carboxylesterase
PGSC0003DMG401029907	1	Type II DNA topoisomerase VI subunit B
PGSC0003DMG401023644	1	26S proteasome subunit RPN5b
PGSC0003DMG400019936	1	Small nuclear ribonucleoprotein
PGSC0003DMG400004273	1	Serine/arginine-rich protein
PGSC0003DMG400029934	1	Sphingolipid delta-8 desaturase
PGSC0003DMG400006076	1	F-box family protein
PGSC0003DMG402029202	1	Vetispiradiene synthase
PGSC0003DMG400004752	1	Hairy meristem
PGSC0003DMG400018243	1	Nucleic acid binding protein
PGSC0003DMG400028753	1	Methionyl-tRNA synthetase
PGSC0003DMG401017043	1	Phd finger transcription factor
PGSC0003DMG400024759	1	Arginine/serine-rich splicing factor
PGSC0003DMG401023992	1	Conserved gene of unknown function
PGSC0003DMG400025023	1	Avr9/Cf-9 rapidly elicited protein 20
PGSC0003DMG400018145	1	Enzyme inhibitor
PGSC0003DMG402011958	1	Binding protein
PGSC0003DMG400010530	1	Conserved gene of unknown function
PGSC0003DMG400025481	1	WRKY domain class transcription factor
PGSC0003DMG400015504	1	DNA methyltransferase
PGSC0003DMG400034307	1	Histidine kinase 3B
PGSC0003DMG400010315	1	Adaptin ear-binding coat-associated protein
PGSC0003DMG400009652	1	Conserved gene of unknown function
PGSC0003DMG400014715	1	Calmodulin binding protein
PGSC0003DMG400030834	1	Thylakoid lumenal 29 kDa protein, chloroplastic
PGSC0003DMG400020356	1	Mitochondrial uncoupling protein
PGSC0003DMG400005408	1	Transcription factor
PGSC0003DMG400032562	1	ATP-dependent Clp protease proteolytic subunit
PGSC0003DMG400008017	1	Protein translocase
PGSC0003DMG400003160	1	Heat stress transcription factor A-1
PGSC0003DMG400003949	1	Conserved gene of unknown function
PGSC0003DMG400015280	1	Conserved gene of unknown function
PGSC0003DMG401030252	1	Conserved gene of unknown function
PGSC0003DMG400024154	1	3-isopropylmalate dehydrogenase small subunit
PGSC0003DMG400024825	1	F-box family protein
PGSC0003DMG400042500	1	Pentatricopeptide repeat-containing protein
PGSC0003DMG400025786	1	DJ-1 family protein
PGSC0003DMG400000600	1	Protein HVA22
PGSC0003DMG400000185	1	ATP binding protein
PGSC0003DMG400022699	1	Resistance gene
PGSC0003DMG400025627	1	Protein COBRA
PGSC0003DMG400005915	1	EIL1
PGSC0003DMG400013918	1	Trichohyalin
PGSC0003DMG400009123	1	Salt tolerance protein 5
PGSC0003DMG400001104	1	DEAD-box ATP-dependent RNA helicase 37
PGSC0003DMG400007192	1	ATP-dependent RNA helicase
PGSC0003DMG400024704	1	WD-repeat protein
PGSC0003DMG402011782	1	Poly(P)/ATP NAD kinase
PGSC0003DMG400008182	1	Heat shock protein DnaJ
PGSC0003DMG400004794	1	Conserved gene of unknown function
PGSC0003DMG400016742	1	Protein phosphatase 2C AHG3 homolog
PGSC0003DMG400033904	1	SANT/MYB domain protein
PGSC0003DMG400006381	1	Glutamyl-tRNA reductase
PGSC0003DMG400033031	1	Galactosyltransferase
PGSC0003DMG400018260	1	Histidyl-tRNA synthetase
PGSC0003DMG401013112	1	Pleiotropic drug resistance protein 1
PGSC0003DMG400019068	1	Sn-1 protein
PGSC0003DMG400011500	1	CDC5
PGSC0003DMG400018542	1	3-5 exonuclease
PGSC0003DMG400006633	1	Conserved gene of unknown function
PGSC0003DMG400025855	1	Seed maturation protein PM23
PGSC0003DMG400003322	1	Conserved gene of unknown function
PGSC0003DMG400031006	1	Protein PPLZ12
PGSC0003DMG400000802	1	Conserved gene of unknown function
PGSC0003DMG400003537	1	Beta-galactosidase
PGSC0003DMG400012557	1	Ubiquitin carboxyl-terminal hydrolase
PGSC0003DMG400020344	1	DIV3B protein
PGSC0003DMG400008991	1	Ubiquitin-activating enzyme E1c
PGSC0003DMG400003901	1	UDP-glucose:glucosyltransferase
PGSC0003DMG400019620	1	UMP synthase
PGSC0003DMG400027362	1	Glu-rich protein
PGSC0003DMG400015613	1	F-box and wd40 domain protein
PGSC0003DMG402008471	1	Nucleotide binding protein
PGSC0003DMG400024596	1	Protein kinase atmrk1
PGSC0003DMG400016397	1	Prefoldin subunit 5
PGSC0003DMG400019641	1	Inositol or phosphatidylinositol kinase
PGSC0003DMG400017737	1	UDP-glucosyltransferase
PGSC0003DMG400000516	1	Polyribonucleotide nucleotidyltransferase
PGSC0003DMG400007665	1	Cinnamoyl-CoA reductase
PGSC0003DMG400006987	1	Pre-mRNA-splicing factor isy-1
PGSC0003DMG400004115	1	NHL repeat-containing protein
PGSC0003DMG400005835	1	WRKY transcription factor-30
PGSC0003DMG400022960	1	Triacylglycerol lipase
PGSC0003DMG400002179	1	Glutathione S-transferase
PGSC0003DMG400007354	1	Heterogeneous nuclear ribonucleoprotein
PGSC0003DMG400028442	1	Floral homeotic protein AGAMOUS
PGSC0003DMG400017636	1	AMP deaminase
PGSC0003DMG400029638	1	Conserved gene of unknown function
PGSC0003DMG400010042	1	NAD dependent epimerase/dehydratase
PGSC0003DMG400019253	1	S-adenosylmethionine-dependent methyltransferase
PGSC0003DMG402001693	1	Pentatricopeptide repeat-containing protein
PGSC0003DMG400033873	1	Conserved gene of unknown function
PGSC0003DMG400000420	1	Histone H2B.2
PGSC0003DMG400025731	1	Zinc ion binding protein
PGSC0003DMG402004451	1	Electron transport SCO1/SenC family protein
PGSC0003DMG400029756	1	Conserved gene of unknown function
PGSC0003DMG400006415	1	14-3-3 protein 7
PGSC0003DMG400002250	1	ATP binding protein
PGSC0003DMG400026081	1	C2H2L domain class transcription factor
PGSC0003DMG400032106	1	RRNA methylase
PGSC0003DMG400034102	1	Acetolactate synthase
PGSC0003DMG400016181	1	4-nitrophenylphosphatase
PGSC0003DMG400022651	1	Nucleic acid binding protein
PGSC0003DMG400033082	1	Membrane associated ring finger 1,8
PGSC0003DMG400016667	1	Potassium transporter
PGSC0003DMG400008158	1	Inosine-5'-monophosphate dehydrogenase
PGSC0003DMG400026480	1	Mitotic-spindle organizing protein 1B
PGSC0003DMG400002375	1	Pantoate-beta-alanine ligase
PGSC0003DMG400023051	1	Conserved gene of unknown function
PGSC0003DMG400012581	1	Protein phosphatase 2c
PGSC0003DMG400030899	1	Clathrin assembly protein
PGSC0003DMG400001595	1	Triosephosphate isomerase, chloroplastic
PGSC0003DMG400013541	1	Marker Xucw84
PGSC0003DMG400000906	1	Conserved gene of unknown function
PGSC0003DMG400009276	1	Transcription factor
PGSC0003DMG400016485	1	Nuclear acid binding protein
PGSC0003DMG400001100	1	Electron transport oxidoreductase
PGSC0003DMG400028514	1	Conserved gene of unknown function
PGSC0003DMG400009432	1	Cholinephosphate cytidylyltransferase
PGSC0003DMG400031456	1	Proline transporter
PGSC0003DMG400014703	1	Conserved gene of unknown function
PGSC0003DMG400011633	1	WRKY-type transcription factor
PGSC0003DMG401022797	1	SEC14 cytosolic factor / phosphoglyceride transfer family protein
PGSC0003DMG400006661	1	ASR4
PGSC0003DMG400033616	1	Ring finger protein
PGSC0003DMG400002046	1	Aspartic proteinase nepenthesin-1
PGSC0003DMG401004870	1	26S protease regulatory subunit 7 homolog A
PGSC0003DMG400007149	1	Phosphoglycerate mutase
PGSC0003DMG400015490	1	Galactinol synthase
PGSC0003DMG400013966	1	MYB transcription factor
PGSC0003DMG400029551	1	Arginine/serine-rich splicing factor
PGSC0003DMG400009505	1	Pentatricopeptide repeat-containing protein
PGSC0003DMG400009029	1	Ran GTPase-activating protein 2
PGSC0003DMG400000974	1	LOB domain-containing protein 6
PGSC0003DMG400019624	1	Helix-loop-helix DNA-binding
PGSC0003DMG400002170	1	Glutathione-S-transferase
PGSC0003DMG400020817	1	Inosine monophosphate cyclohydrolase
PGSC0003DMG400006048	1	Conserved gene of unknown function
PGSC0003DMG400007189	1	Proteasome subunit alpha type
PGSC0003DMG400014681	1	Pantothenate kinase
PGSC0003DMG400016589	1	4-alpha-glucanotransferase
PGSC0003DMG400014831	1	Heat shock protein DnaJ N-terminal domain-containing protein
PGSC0003DMG400005507	1	Delta-12 fatty acid desaturase
PGSC0003DMG400021195	1	UPF0497 membrane protein 15
PGSC0003DMG400011810	1	PHAVOLUTA-like HD-ZIPIII protein
PGSC0003DMG401008288	1	Cytochrome B561
PGSC0003DMG400007141	1	ABC transporter family protein
PGSC0003DMG402004382	1	Conserved gene of unknown function
PGSC0003DMG400007062	1	50S ribosomal protein L13, chloroplastic
PGSC0003DMG404008678	1	Protein kinase
PGSC0003DMG400032816	1	Zinc finger family protein
PGSC0003DMG400006799	1	Cellulose synthase
PGSC0003DMG401014997	1	Zinc finger protein
PGSC0003DMG400025576	1	Conserved gene of unknown function
PGSC0003DMG401012679	1	Allene oxide cyclase
PGSC0003DMG400000236	1	Ormdl
PGSC0003DMG401020115	1	Fimbrin
PGSC0003DMG400008191	1	Puromycin-sensitive aminopeptidase
PGSC0003DMG400011246	1	Glyceraldehyde-3-phosphate dehydrogenase
PGSC0003DMG400028819	1	RING-H2 finger protein ATL3J
PGSC0003DMG400030220	1	Protein cbxX, chromosomal
PGSC0003DMG400015624	1	F-box domain containing protein
PGSC0003DMG400014635	1	C2 domain-containing protein
PGSC0003DMG400025414	1	Zinc finger protein CONSTANS-LIKE 15
PGSC0003DMG400005560	1	Transcription factor
PGSC0003DMG400014982	1	Gene of unknown function
PGSC0003DMG402015205	1	Protein yrdA
PGSC0003DMG400023949	1	Abscisic acid receptor PYL4
PGSC0003DMG400029174	1	GNS1/SUR4 membrane family protein
PGSC0003DMG400020656	1	RNA binding protein
PGSC0003DMG400023798	1	Embryo-specific 3
PGSC0003DMG400004131	1	Major latex
PGSC0003DMG400015489	1	Transcription factor APFI
PGSC0003DMG400024347	1	Cytokinesis negative regulator RCP1
PGSC0003DMG400002069	1	Cysteine string protein
PGSC0003DMG402026767	1	Delta 1-pyrroline-5-carboxylate synthetase
PGSC0003DMG400005102	1	Conserved gene of unknown function
PGSC0003DMG401029995	1	Bacterial spot disease resistance protein 4
PGSC0003DMG400000738	1	Phosphatidylinositol transporter
PGSC0003DMG400009560	1	Conserved gene of unknown function
PGSC0003DMG400025740	1	Magnesium transporter
PGSC0003DMG402021263	1	Uroporphyrinogen decarboxylase
PGSC0003DMG400004616	1	Invertase inhibitor
PGSC0003DMG400022311	1	Conserved gene of unknown function
PGSC0003DMG400012982	1	Conserved gene of unknown function
PGSC0003DMG400030785	1	Helicase
PGSC0003DMG400011665	1	Conserved gene of unknown function
PGSC0003DMG400032800	1	Transferase, transferring glycosyl groups
PGSC0003DMG400007949	1	Conserved gene of unknown function
PGSC0003DMG400015555	1	Chloroplast-targeted copper chaperone
PGSC0003DMG400007952	1	N-hydroxycinnamoyl/benzoyltransferase 6
PGSC0003DMG400021834	1	Metal ion binding protein
PGSC0003DMG400011353	1	TIR1
PGSC0003DMG400029192	1	Conserved gene of unknown function
PGSC0003DMG400033051	1	Conserved gene of unknown function
PGSC0003DMG400022404	1	F-box family protein
PGSC0003DMG400021439	1	Cytochrome P450
PGSC0003DMG400030439	1	Hydrolase, hydrolyzing O-glycosyl compounds
PGSC0003DMG400008589	1	RNA helicase
PGSC0003DMG400014263	1	Per1-like family protein
PGSC0003DMG400012824	1	Conserved gene of unknown function
PGSC0003DMG400009398	1	Conserved gene of unknown function
PGSC0003DMG400004452	1	Nucleotide binding protein
PGSC0003DMG400013209	1	Conserved gene of unknown function
PGSC0003DMG401016772	1	Syntaxin
PGSC0003DMG402002240	1	Queuine tRNA-ribosyltransferase
PGSC0003DMG400003447	1	Conserved gene of unknown function
PGSC0003DMG400010136	1	Stigma expressed protein
PGSC0003DMG400012188	1	Mitogen-activated protein kinase
PGSC0003DMG400030005	1	Poly(A) polymerase
PGSC0003DMG400021134	1	Gamma-soluble nsf attachment protein
PGSC0003DMG402024761	1	Serine/threonine-protein phosphatase
PGSC0003DMG400020627	1	BZIP transcription factor
PGSC0003DMG400016997	1	Pentatricopeptide repeat-containing protein
PGSC0003DMG400008761	1	R2R3 transcription factor MYB108 1
PGSC0003DMG400015414	1	Conserved gene of unknown function
PGSC0003DMG400018314	1	Protein phosphatase-2c
PGSC0003DMG400020781	1	DEAD-box ATP-dependent RNA helicase 56
PGSC0003DMG401023438	1	Epoxide hydrolase
PGSC0003DMG400010324	1	Pre-mRNA-splicing factor SLU7
PGSC0003DMG400014848	1	Peptidyl-prolyl cis-trans isomerase
PGSC0003DMG400022304	1	Extracellular ligand-gated ion channel
PGSC0003DMG400008632	1	Chalcone synthase J
PGSC0003DMG400004470	1	Transcription factor TF2
PGSC0003DMG400000875	1	Peptidyl-prolyl cis-trans isomerase cyclophilin-type family protein
PGSC0003DMG401024581	1	Pyridoxamine 5-phosphate oxidase
PGSC0003DMG400028892	1	Conserved gene of unknown function
PGSC0003DMG400015341	1	Glucose-6-phosphate isomerase
PGSC0003DMG400003032	1	Cytochrome P450
PGSC0003DMG400018887	1	Conserved gene of unknown function
PGSC0003DMG400025841	1	Anthranilate N-hydroxycinnamoyl/benzoyltransferase
PGSC0003DMG400002756	1	Beta-fructofuranosidase
PGSC0003DMG400028177	1	Pyruvate kinase
PGSC0003DMG400020831	1	Conserved gene of unknown function
PGSC0003DMG400001121	1	Cysteine desulfurylase
PGSC0003DMG400047121	1	Cytochrome P450
PGSC0003DMG400025497	1	Conserved gene of unknown function
PGSC0003DMG400030062	1	Pentatricopeptide repeat-containing protein
PGSC0003DMG400024708	1	Rubber elongation factor protein
PGSC0003DMG400009530	1	WRKY transcription factor 3
PGSC0003DMG400012964	1	Lipase
PGSC0003DMG400014792	1	ATP binding protein
PGSC0003DMG400028390	1	Gene of unknown function
PGSC0003DMG400010161	1	HCF106
PGSC0003DMG400002845	1	Nucleotide pyrophosphatase/phosphodiesterase
PGSC0003DMG400021330	1	Conserved gene of unknown function
PGSC0003DMG400018631	1	Gene of unknown function
PGSC0003DMG400029660	1	Cyclin dependent kinase inhibitor
PGSC0003DMG402000567	1	NADH dehydrogenase [ubiquinone] 1 alpha subcomplex subunit 12
PGSC0003DMG400013545	1	Protein kinase APK1B, chloroplast
PGSC0003DMG400027703	1	Alphavirus core protein family
PGSC0003DMG400011618	1	Patellin-6
PGSC0003DMG401018633	1	Axoneme-associated protein mst101
PGSC0003DMG400002204	1	Pollen specific protein sf21
PGSC0003DMG400022062	1	Aspartic proteinase
PGSC0003DMG400025982	1	Conserved gene of unknown function
PGSC0003DMG401006167	1	26S proteasome non-ATPase regulatory subunit 3
PGSC0003DMG400020350	1	Defective in exine formation
PGSC0003DMG400000498	1	Homeodomain leucine zipper protein
PGSC0003DMG400023271	1	Zinc finger protein
PGSC0003DMG401000076	1	Protein ABIL1
PGSC0003DMG400031097	1	Conserved gene of unknown function
PGSC0003DMG400012189	1	Conserved gene of unknown function
PGSC0003DMG400022917	1	Exostosin family protein
PGSC0003DMG400009255	1	Small heat-shock protein homolog protein
PGSC0003DMG400032829	1	C3HL domain class transcription factor
PGSC0003DMG400004043	1	Conserved gene of unknown function
PGSC0003DMG400025357	1	Zinc binding dehydrogenase
PGSC0003DMG400025678	1	Potassium channel NtKC1
PGSC0003DMG400014800	1	FAD-binding domain-containing protein
PGSC0003DMG400010880	1	Adenosine 3'-phospho 5'-phosphosulfate transporter
PGSC0003DMG400001441	1	Cyclic nucleotide-gated ion channel
PGSC0003DMG400018651	1	Amino acid transporter
PGSC0003DMG400030115	1	Protein kinase p34cdc2
PGSC0003DMG400030501	1	Quinolinate phosphirobosyltransferase
PGSC0003DMG400013145	1	Conserved gene of unknown function
PGSC0003DMG400004317	1	Stellacyanin
PGSC0003DMG400019856	1	Poly(A) polymerase
PGSC0003DMG400031374	1	Zinc finger CCCH domain-containing protein 17
PGSC0003DMG400007603	1	I-box binding factor
PGSC0003DMG400011358	1	DNAJ heat shock N-terminal domain-containing protein
PGSC0003DMG400017812	1	40S ribosomal protein S5
PGSC0003DMG400019256	1	Pectinesterase
PGSC0003DMG401025508	1	Gene of unknown function
PGSC0003DMG400028675	1	Pectinesterase-2
PGSC0003DMG400022934	1	Conserved gene of unknown function
PGSC0003DMG400004937	1	Poly(RC)-binding protein
PGSC0003DMG400013857	1	Trehalose 6-phosphate phosphatase
PGSC0003DMG400016969	1	Proteasome subunit beta type
PGSC0003DMG400005442	1	Uncharacterized GPI-anchored protein
PGSC0003DMG400014327	1	Methyl binding domain protein
PGSC0003DMG400018482	1	Conserved gene of unknown function
PGSC0003DMG400032227	1	Amino acid transporter
PGSC0003DMG400027427	1	Fibronectin type III domain containing protein
PGSC0003DMG400004378	1	GDSL esterase/lipase
PGSC0003DMG400017542	1	Cinnamoyl-CoA reductase
PGSC0003DMG400005019	1	Ormdl
PGSC0003DMG401007575	1	Cc-nbs-lrr resistance protein
PGSC0003DMG400016328	1	Nuclear-pore anchor
PGSC0003DMG400003707	1	Pre-pro-cysteine proteinase
PGSC0003DMG400016921	1	Histone H2B
PGSC0003DMG400024182	1	Ribulose bisphosphate carboxylase small chain C, chloroplastic
PGSC0003DMG400003799	1	Conserved gene of unknown function
PGSC0003DMG400011507	1	Conserved gene of unknown function
PGSC0003DMG400006368	1	Cytochrome P450 92B1
PGSC0003DMG400001042	1	GTPase activating protein
PGSC0003DMG400009458	1	ATP binding / binding / protein kinase/ protein serine/threonine kinase/ protein tyrosine kinase
PGSC0003DMG400006394	1	DNA binding protein
PGSC0003DMG400011751	1	2-oxoglutarate-dependent dioxygenase
PGSC0003DMG400011801	1	DWARF1/DIMINUTO
PGSC0003DMG400024498	1	UPF0497 membrane protein
PGSC0003DMG400019081	1	Uridylate kinase plant
PGSC0003DMG400027236	1	DNA binding protein
PGSC0003DMG402005606	1	Pyridoxin biosynthesis protein PDX1
PGSC0003DMG401029631	1	Pleiotropic drug resistance protein 1
PGSC0003DMG400025473	1	CBS domain containing protein
PGSC0003DMG400008591	1	O-methyltransferase
PGSC0003DMG400006782	1	Conserved gene of unknown function
PGSC0003DMG400014677	1	Glycosyltransferase QUASIMODO1
PGSC0003DMG400008021	1	Protein phosphatase
PGSC0003DMG400021701	1	Conserved gene of unknown function
PGSC0003DMG400024819	1	Nodulin MtN3 family protein
PGSC0003DMG400027249	1	Conserved gene of unknown function
PGSC0003DMG400024160	1	Phospholipase A1
PGSC0003DMG400019270	1	Conserved gene of unknown function
PGSC0003DMG401003328	1	MYBR6
PGSC0003DMG400016655	1	Transporter
PGSC0003DMG400014101	1	Cell growth-regulating nucleolar protein
PGSC0003DMG400029787	1	Molecular chaperone Hsp90-1
PGSC0003DMG400030472	1	TSI1
PGSC0003DMG400004338	1	Mitochondrial import inner membrane translocase subunit Tim8/small zinc finger
PGSC0003DMG400021423	1	Homeodomain leucine-zipper 1
PGSC0003DMG400003924	1	Amino acid binding protein
PGSC0003DMG400017292	1	Protein pof4
PGSC0003DMG400038162	1	RRNA methylase
PGSC0003DMG400033335	1	Calcium-dependent protein kinase 8
PGSC0003DMG400029895	1	Importin alpha
PGSC0003DMG400001670	1	Receptor protein kinase
PGSC0003DMG401015867	1	F-box family protein
PGSC0003DMG400025272	1	Per1-like family protein
PGSC0003DMG400023410	1	Ankyrin repeat protein
PGSC0003DMG400027526	1	Prolyl-tRNA synthetase
PGSC0003DMG400015721	1	Gene of unknown function
PGSC0003DMG400009106	1	Polypyrimidine tract binding protein
PGSC0003DMG400007001	1	Protein kinase 2 beta chain
PGSC0003DMG402013013	1	Protein binding / signal transducer
PGSC0003DMG400030951	1	Ubiquitin-activating enzyme E1b
PGSC0003DMG400025385	1	Senescence-associated protein
PGSC0003DMG400006348	1	Gene of unknown function
PGSC0003DMG400014598	1	AP2 domain-containing transcription factor
PGSC0003DMG400021609	1	Receptor protein kinase
PGSC0003DMG400032539	1	Conserved gene of unknown function
PGSC0003DMG400023776	1	Partner of Y14-mago
PGSC0003DMG400024029	1	Histone H2A
PGSC0003DMG400035336	1	Gene of unknown function
PGSC0003DMG400026549	1	Amino acid transporter
PGSC0003DMG400018824	1	RBP50
PGSC0003DMG400032815	1	Chromatin remodeling complex subunit
PGSC0003DMG400001879	1	Annexin p35
PGSC0003DMG400018943	1	Sulfate adenylyltransferase
PGSC0003DMG402015684	1	ALY protein
PGSC0003DMG400010682	1	Thylakoid lumenal 21.5 kDa protein, chloroplast
PGSC0003DMG400004265	1	DEAD-box ATP-dependent RNA helicase 48
PGSC0003DMG400031029	1	KEA5; potassium ion transmembrane transporter/ potassium:hydrogen antiporter
PGSC0003DMG400033928	1	Peptidase S41 family protein
PGSC0003DMG400015370	1	Conserved gene of unknown function
PGSC0003DMG400022875	1	Conserved gene of unknown function
PGSC0003DMG400014417	1	Ethylene-responsive transcription factor 3
PGSC0003DMG401012456	1	WD-repeat protein
PGSC0003DMG400019574	1	Carbon-nitrogen hydrolase family protein
PGSC0003DMG400001840	1	Reticulon B22
PGSC0003DMG400015392	1	50S ribosomal protein L13, chloroplastic
PGSC0003DMG400027683	1	Protein kinase
PGSC0003DMG401015497	1	RNA pseudourine synthase 5
PGSC0003DMG401020668	1	Conserved gene of unknown function
PGSC0003DMG400010697	1	YA4
PGSC0003DMG400030864	1	Conserved gene of unknown function
PGSC0003DMG400024772	1	Protein phosphatase 2c
PGSC0003DMG402032565	1	Arabinogalactan protein
PGSC0003DMG400000555	1	Nam 1
PGSC0003DMG400027903	1	60S ribosomal protein L1
PGSC0003DMG400000425	1	Flavonoid 3',5'-hydroxylase
PGSC0003DMG400018875	1	Arginine/serine-rich splicing factor
PGSC0003DMG400029073	1	Dual specificity protein phosphatase
PGSC0003DMG400010557	1	Allene oxide syntase
PGSC0003DMG400000922	1	Myb-like DNA-binding domain, SHAQKYF class family protein
PGSC0003DMG400006342	1	ER glycerol-phosphate acyltransferase
PGSC0003DMG400005958	1	Fyve finger-containing phosphoinositide kinase, fyv1
PGSC0003DMG400004961	1	Amino acid transporter
PGSC0003DMG400009946	1	Conserved gene of unknown function
PGSC0003DMG400027787	1	Eukaryotic translation initiation factor 3f, eif3f
PGSC0003DMG400032821	1	Conserved gene of unknown function
PGSC0003DMG400024157	1	Homeobox-leucine zipper protein
PGSC0003DMG400029308	1	Conserved gene of unknown function
PGSC0003DMG400003393	1	DNA double-strand break repair rad50 ATPase
PGSC0003DMG400021574	1	21kD protein
PGSC0003DMG400000131	1	SET domain-containing protein
PGSC0003DMG400015358	1	Nucleic acid binding protein
PGSC0003DMG400026180	1	Protein phosphatase 1 regulatory subunit
PGSC0003DMG400012564	1	DH putative beta-hydroxyacyl-ACP dehydratase
PGSC0003DMG400019748	1	Peroxisomal acetoacetyl-coenzyme A thiolase
PGSC0003DMG400031453	1	Gene of unknown function
PGSC0003DMG400013307	1	Aspartic proteinase nepenthesin-1
PGSC0003DMG400004231	1	Rrm/rnp domain
PGSC0003DMG400031769	1	Auxin response factor 3
PGSC0003DMG400024513	1	Serine/threonine protein kinase
PGSC0003DMG400026239	1	HOS1
PGSC0003DMG400010342	1	Conserved gene of unknown function
PGSC0003DMG402016244	1	Conserved gene of unknown function
PGSC0003DMG400023496	1	Eukaryotic peptide chain release factor subunit 1-3
PGSC0003DMG400016607	1	Nt-Rab11e protein
PGSC0003DMG400012987	1	Threonine dehydratase biosynthetic, chloroplastic
PGSC0003DMG400025425	1	DnaJ
PGSC0003DMG400010750	1	ERF transcription factor
PGSC0003DMG400006145	1	Histidine kinase 1, 2, 3 plant
PGSC0003DMG400000229	1	Ubiquitin ligase SINAT3
PGSC0003DMG400018894	1	Gene of unknown function
PGSC0003DMG400007070	1	Polynucleotide kinase-3'-phosphatase
PGSC0003DMG400006083	1	CBL-interacting protein kinase 20
PGSC0003DMG401022631	1	Conserved gene of unknown function
PGSC0003DMG400034309	1	Non-specific lipid-transfer protein
PGSC0003DMG400021104	1	Isoform 2 of Cleavage and polyadenylation specificity factor CPSF30
PGSC0003DMG400001956	1	Component of oligomeric golgi complex
PGSC0003DMG400003470	1	Ethylene-responsive small GTP-binding protein
PGSC0003DMG400028204	1	Proteophosphoglycan 5
PGSC0003DMG400018423	1	Phytanoyl-CoA dioxygenase domain containing
PGSC0003DMG400011403	1	Small nuclear ribonucleoprotein
PGSC0003DMG402000630	1	Racemase and epimerase, acting on amino acids and derivatives
PGSC0003DMG400001606	1	RNA binding protein
PGSC0003DMG402009189	1	Mannosyl-oligosaccharide alpha-1,2-mannosidase
PGSC0003DMG400012995	1	Guanine nucleotide-binding protein alpha-1 subunit
PGSC0003DMG400027723	1	Pentatricopeptide repeat-containing protein
PGSC0003DMG400033681	1	GTP-binding protein alpha subunit, gna
PGSC0003DMG400031350	1	Uridylate kinase
PGSC0003DMG400011597	1	Developmentally regulated GTP-binding protein
PGSC0003DMG400003723	1	Conserved gene of unknown function
PGSC0003DMG400019489	1	Salt-induced AAA-Type ATPase
PGSC0003DMG400013406	1	S-adenosylmethionine-dependent methyltransferase
PGSC0003DMG400043061	1	Serine-threonine protein kinase, plant-type
PGSC0003DMG400007258	1	Tyrosine specific protein phosphatase and dual specificity protein phosphatase
PGSC0003DMG400013719	1	F-box/ankyrin repeat protein SKIP35
PGSC0003DMG401029142	1	Acid phosphatase 1
PGSC0003DMG400021720	1	Binding protein
PGSC0003DMG400005016	1	Pathogenesis-induced protein
PGSC0003DMG400029065	1	Gene of unknown function
PGSC0003DMG401017733	1	Zinc finger protein
PGSC0003DMG400027602	1	Uroporphyrinogen decarboxylase, chloroplastic
PGSC0003DMG400007903	1	Cyclic nucleotide-gated ion channel
PGSC0003DMG400006504	1	Conserved gene of unknown function
PGSC0003DMG400012367	1	LRR receptor-like serine/threonine-protein kinase RPK2
PGSC0003DMG402026272	1	Endosomal P24A protein
PGSC0003DMG401029312	1	DNA binding protein
PGSC0003DMG400025395	1	Nitrate transporter
PGSC0003DMG400030997	1	Conserved gene of unknown function
PGSC0003DMG400027798	1	Auxin response factor
PGSC0003DMG400028524	1	60S ribosomal protein L7
PGSC0003DMG400005106	1	Conserved gene of unknown function
PGSC0003DMG400030830	1	Serine/threonine-protein kinase SAPK1
PGSC0003DMG400012795	1	Cytochrome P450
PGSC0003DMG400006989	1	Shaggy-like kinase 59
PGSC0003DMG400023356	1	UDP-glucose:glucosyltransferase
PGSC0003DMG400014661	1	Conserved gene of unknown function
PGSC0003DMG400028234	1	Coatomer subunit beta-1
PGSC0003DMG400014722	1	Sterol delta-7 reductase DWF5
PGSC0003DMG400008736	1	Galactosyltransferase family protein
PGSC0003DMG400023166	1	Gene of unknown function
PGSC0003DMG400031085	1	Vacuolar cation/proton exchanger
PGSC0003DMG400024399	1	Conserved gene of unknown function
PGSC0003DMG400019142	1	Bel1 homeotic protein
PGSC0003DMG400016530	1	Sugar transporter
PGSC0003DMG400001571	1	Plant ubiquilin
PGSC0003DMG400011451	1	Transmembrane and coiled-coil domains protein
PGSC0003DMG400021271	1	Gene of unknown function
PGSC0003DMG400019450	1	Peptide-N(4)-(N-acetyl-beta-glucosaminyl)asparagine amidase
PGSC0003DMG402026561	1	Protein bem46
PGSC0003DMG400018052	1	Gene of unknown function
PGSC0003DMG400019767	1	Mitochondrial import inner membrane translocase subunit Tim17
PGSC0003DMG400035539	1	Sugar transporter
PGSC0003DMG400027846	1	Cell cycle control protein cwf22
PGSC0003DMG400026945	1	UPF0497 membrane protein 8
PGSC0003DMG401018597	1	Alpha-L-fucosidase 2
PGSC0003DMG400008311	1	50 kDa ketoavyl-ACP synthase
PGSC0003DMG400010157	1	Forever young oxidoreductase
PGSC0003DMG400011266	1	Catechol O-methyltransferase
PGSC0003DMG400004124	1	Ribosomal protein S9
PGSC0003DMG400016727	1	Light-induced protein, chloroplastic
PGSC0003DMG400010645	1	Cellular retinaldehyde-binding/triple function, C-terminal
PGSC0003DMG400004670	1	Xyloglucan endo-transglycosylase
PGSC0003DMG402007612	1	DNA-directed RNA polymerase III subunit F
PGSC0003DMG400006930	1	Transcription factor
PGSC0003DMG400002769	1	Knox
PGSC0003DMG400005358	1	Senescence-associated protein
PGSC0003DMG400008427	1	Tetracycline transporter
PGSC0003DMG400030006	1	PAR-1b protein
PGSC0003DMG401025066	1	Conserved gene of unknown function
PGSC0003DMG400019647	1	Heat shock protein 90
PGSC0003DMG400010426	1	Conserved gene of unknown function
PGSC0003DMG401010200	1	Conserved gene of unknown function
PGSC0003DMG400027619	1	Serine palmitoyltransferase I
PGSC0003DMG400000449	1	SNF7 family protein
PGSC0003DMG400015158	1	Protein bem46
PGSC0003DMG400020434	1	Ribosomal protein L11
PGSC0003DMG400025433	1	Conserved gene of unknown function
PGSC0003DMG400031255	1	Isopenicillin N epimerase
PGSC0003DMG400000394	1	U3 small nucleolar ribonucleoprotein protein imp4
PGSC0003DMG400014092	1	Conserved gene of unknown function
PGSC0003DMG400020780	1	Brittle 1 protein
PGSC0003DMG400020869	1	Sodium-dependent phosphate transport protein
PGSC0003DMG400004483	1	Lysophospholipase
PGSC0003DMG400018102	1	Calmodulin-binding protein
PGSC0003DMG401025831	1	B3 domain-containing protein
PGSC0003DMG400026161	1	NBS-LRR type disease resistance protein
PGSC0003DMG400019316	1	Homocysteine s-methyltransferase
PGSC0003DMG400012041	1	Zinc finger protein
PGSC0003DMG400029915	1	Acyl-CoA synthetase
PGSC0003DMG400020083	1	Conserved gene of unknown function
PGSC0003DMG400033350	1	Gene of unknown function
PGSC0003DMG400007711	1	Conserved gene of unknown function
PGSC0003DMG400007807	1	14-3-3 protein
PGSC0003DMG400024017	1	Phytochrome B
PGSC0003DMG400022692	1	RNA-binding protein AKIP1
PGSC0003DMG400000918	1	Conserved gene of unknown function
PGSC0003DMG400012034	1	Conserved gene of unknown function
PGSC0003DMG400029898	1	Conserved gene of unknown function
PGSC0003DMG400010259	1	F-box family protein
PGSC0003DMG400020227	1	Conserved gene of unknown function
PGSC0003DMG400031808	1	ATP binding protein
PGSC0003DMG402019891	1	Thaliana 60S ribosomal protein L7
PGSC0003DMG400011873	1	Cys2/His2 zinc-finger transcription factor
PGSC0003DMG400015883	1	Sn-1 protein
PGSC0003DMG400005489	1	Eukaryotic translation initiation factor 2 family protein / eIF-2 family protein
PGSC0003DMG400016685	1	Receptor protein kinase CLAVATA1
PGSC0003DMG400012662	1	Conserved gene of unknown function
PGSC0003DMG400007373	1	Beta-ketoacyl-coa synthase family protein
PGSC0003DMG400028389	1	Conserved gene of unknown function
PGSC0003DMG400005415	1	Gene of unknown function
PGSC0003DMG400026814	1	Gene of unknown function
PGSC0003DMG400020701	1	SAUR family protein
PGSC0003DMG400016441	1	WRKY protein
PGSC0003DMG400015849	1	Conserved gene of unknown function
PGSC0003DMG400005103	1	Proline iminopeptidase
PGSC0003DMG400031205	1	Chloroplast lumen common family protein
PGSC0003DMG400018515	1	Conserved gene of unknown function
PGSC0003DMG400003089	1	Flavonol synthase/flavanone 3-hydroxylase
PGSC0003DMG400027316	1	Cysteine-type peptidase
PGSC0003DMG400001668	1	SAUR family protein
PGSC0003DMG400027591	1	Conserved gene of unknown function
PGSC0003DMG400004324	1	Protein-tyrosine phosphatase mitochondrial 1, mitochondrial
PGSC0003DMG400002658	1	Esterase/lipase superfamily protein
PGSC0003DMG400003046	1	GTP binding protein
PGSC0003DMG400029993	1	Nucleic acid binding protein
PGSC0003DMG400002868	1	CW14 protein
PGSC0003DMG400016551	1	Conserved gene of unknown function
PGSC0003DMG400005253	1	Conserved gene of unknown function
PGSC0003DMG400020269	1	Glucose-6-phosphate 1-dehydrogenase, cytoplasmic isoform
PGSC0003DMG400013144	1	Conserved gene of unknown function
PGSC0003DMG400043674	1	3-5 exonuclease
PGSC0003DMG400016792	1	Avr9/Cf-9 rapidly elicited protein 75
PGSC0003DMG402000216	1	Long-chain acyl-CoA synthetase 4
PGSC0003DMG401026234	1	Conserved gene of unknown function
PGSC0003DMG400022792	1	Cytochrome B561
PGSC0003DMG400011790	1	ADP,ATP carrier protein
PGSC0003DMG400006508	1	Conserved gene of unknown function
PGSC0003DMG400030519	1	Oxidoreductase
PGSC0003DMG400031750	1	Protein SIS1
PGSC0003DMG400025126	1	Phospholipid-transporting ATPase 9
PGSC0003DMG400001752	1	P58IPK
PGSC0003DMG400031748	1	Conserved gene of unknown function
PGSC0003DMG400002609	1	Clavaminate synthase
PGSC0003DMG400018572	1	Disease resistance protein I2C-5
PGSC0003DMG400033691	1	50S ribosomal protein L29, chloroplastic
PGSC0003DMG400015128	1	Leucine-rich repeat-containing protein
PGSC0003DMG400017340	1	Serine/threonine-protein phosphatase 5
PGSC0003DMG400012391	1	4-methyl-5(B-hydroxyethyl)-thiazol monophosphate biosynthesis enzyme
PGSC0003DMG400026715	1	Pre-mRNA-splicing factor syf2
PGSC0003DMG400031852	1	Conserved gene of unknown function
PGSC0003DMG400023978	1	Mevalonate disphosphate decarboxylase
PGSC0003DMG400010493	1	Nucleic acid binding protein
PGSC0003DMG401014186	1	Chaperone protein DNAj
PGSC0003DMG400027877	1	Calcium dependant protein kinase
PGSC0003DMG400024993	1	Thermosensitive gluconokinase
PGSC0003DMG400006179	1	Nodulin family protein
PGSC0003DMG400018819	1	Thioredoxin
PGSC0003DMG400025168	1	Lipid binding protein
PGSC0003DMG400009129	1	Ubiquitin ligase SINAT3
PGSC0003DMG400023839	1	Transcription factor
PGSC0003DMG400021452	1	AMP dependent ligase
PGSC0003DMG400017448	1	Cdk10/11
PGSC0003DMG400010973	1	Macrophage migration inhibitory factor family protein
PGSC0003DMG400026413	1	RabGAP/TBC domain-containing protein
PGSC0003DMG400007321	1	Calmodulin binding protein
PGSC0003DMG400030568	1	GABA-specific permease
PGSC0003DMG400011752	1	Cellulose synthase
PGSC0003DMG400014316	1	Zinc finger, C3HC4 type family protein
PGSC0003DMG400014054	1	Oligopeptide transporter
PGSC0003DMG400024321	1	Mutt/nudix hydrolase
PGSC0003DMG400015364	1	CT099
PGSC0003DMG400029220	1	Tospovirus resistance protein A
PGSC0003DMG401009541	1	DNA binding protein
PGSC0003DMG400032555	1	NAC domain protein
PGSC0003DMG400030214	1	Conserved gene of unknown function
PGSC0003DMG400020370	1	Integrin-linked protein kinase
PGSC0003DMG400004285	1	Chromomethylase
PGSC0003DMG400021413	1	Conserved gene of unknown function
PGSC0003DMG400004808	1	Mitochondrial small heat shock protein
PGSC0003DMG400016841	1	WD-repeat protein
PGSC0003DMG400024901	1	Ubiquitin family protein
PGSC0003DMG402023631	1	Phosphofructokinase family protein
PGSC0003DMG400018498	1	F-box family protein
PGSC0003DMG400004812	1	Peroxisomal biogenesis factor
PGSC0003DMG400028535	1	Conserved gene of unknown function
PGSC0003DMG402014948	1	Myosin heavy chain, clone
PGSC0003DMG400027205	1	Protein Pop3
PGSC0003DMG400019135	1	DNA binding protein
PGSC0003DMG400030855	1	Disease resistance protein RGA1
PGSC0003DMG400022291	1	C2 domain-containing protein
PGSC0003DMG400011070	1	FHY1
PGSC0003DMG400017538	1	Conserved gene of unknown function
PGSC0003DMG400013085	1	Gene of unknown function
PGSC0003DMG400033637	1	Nonclathrin coat protein zeta2-COP
PGSC0003DMG400000584	1	Pseudo-response regulator 5
PGSC0003DMG400003889	1	P-glycoprotein
PGSC0003DMG400005914	1	EIN3
PGSC0003DMG400001117	1	Protoporphyrinogen oxidase
PGSC0003DMG400007887	1	Homeobox protein knotted-1-like LET12
PGSC0003DMG400025158	1	Divinyl ether synthase
PGSC0003DMG400007464	1	Gene of unknown function
PGSC0003DMG400001082	1	ATP synthase subunit H protein
PGSC0003DMG400022073	1	Gene of unknown function
PGSC0003DMG400011640	1	Peroxidase
PGSC0003DMG400012210	1	Glutamate--cysteine ligase, chloroplastic
PGSC0003DMG402005821	1	DNA binding protein
PGSC0003DMG400012880	1	Armadillo/beta-catenin repeat family protein
PGSC0003DMG400025328	1	Plasma membrane ATPase 1
PGSC0003DMG400010575	1	Conserved gene of unknown function
PGSC0003DMG400012274	1	UDP-glucose 4-epimerase
PGSC0003DMG400028604	1	Protein kinase
PGSC0003DMG400007377	1	Zinc finger protein
PGSC0003DMG400020828	1	RabA2
PGSC0003DMG400022319	1	Cysteine-type peptidase
PGSC0003DMG400024570	1	5-formyltetrahydrofolate cycloligase
PGSC0003DMG400019479	1	Kelch repeat-containing protein
PGSC0003DMG400007401	1	MYB-CC type transfactor
PGSC0003DMG400028219	1	Diphteria toxin resistance protein 2, dph2
PGSC0003DMG400010316	1	G1-like6 protein
PGSC0003DMG400006555	1	ATCUL3/ATCUL3A/CUL3/CUL3A
PGSC0003DMG400029655	1	F-Box protein
PGSC0003DMG400010158	1	Kinase interacting protein
PGSC0003DMG400019744	1	C2 and GRAM domain-containing protein
PGSC0003DMG400025190	1	Pentatricopeptide repeat-containing protein
PGSC0003DMG400004438	1	Aquaporin, MIP family, PIP subfamily
PGSC0003DMG401012961	1	Aspartic proteinase nepenthesin-1
PGSC0003DMG400009230	1	Non-imprinted in Prader-Willi/Angelman syndrome region protein
PGSC0003DMG400014594	1	Ethylene response factor
[truncated: 1,594 more rows]
